# Supplementary material
Source: PubMed Central journal article supplement (PMC6644390)
Supplement: MD-010-C9MD00102F-s001.pdf [file MD-010-C9MD00102F-s001.pdf]

Supplementary Information:

## **Binding Site Characterization – Similarity, Promiscuity, and Druggability**

Christiane Ehrh, Tobias Brinkjost, Oliver Koch

MedChemComm, 2019, DOI: 10.1039/C9MD00102F

Contents:

- 2 Fig. S1** Boxplots of the Shape Tanimoto and Color Tanimoto for the binned Tanimoto Combo similarities of the ROCS<sup>1</sup>-based sc-PDB ligand comparisons.  
**Fig. S2** Similarity matrix of clusters of sc-PDB ligands with high shape and physicochemical similarities.
- 3 Fig. S3** Distribution of targets in the ROCS dataset.
- 4 Fig. S4** Ligand-based alignments of protein binding sites binding to similar ligands in similar conformations.
- 5 Fig. S5** Ligand-based alignments of protein binding sites binding to similar flavone-related ligands in similar conformations.
- 6 Fig. S6** Distribution of the fpocket<sup>2</sup>-derived polarity and hydrophobicity scores for structures which are exclusively found in pairs with high shape and low physicochemical similarity or in pairs with high shape and color similarity.
- 7 Fig. S7** DoGSite<sup>3</sup>-derived druggability for the sites in unrelated proteins binding to similar ligands in the ROCS dataset.
- 8 Fig. S8** Box plots of the scaled hydrophobicity and polarity descriptors derived from analyses with fpocket<sup>2</sup>, VolSite<sup>4</sup>, and DoGSite<sup>3</sup> together with the obtained druggability scores for the NMR dataset.
- 9 Fig. S9** Boxplots of the DrugScore and the SimpleScore calculated with DoGSiteScorer<sup>3</sup> for the X-ray and NMR dataset.
- 10 Fig. S10** Boxplots of the scaled hydrophobicity and polarity values for the dissimilar, mainly hydrophobic binding sites in complex with different ligand types.
- 11 Fig. S11** Boxplots of the scaled hydrophobicity and polarity values for the dissimilar binding sites of average hydrophobicity in complex with different ligand types.
- 12 Table S1** The ten largest enzyme groups (according to the first two digits of the EC nomenclature) in the PDB, the sc-PDB, and the ROCS dataset.
- 13 Table S2** Typical antitargets in the similar cavity pairs of the ROCS dataset. Their characteristics, the proteins of pockets in complex with similar ligands, the SiteHopper scores, and known common inhibitors from the ChEMBL database are provided.
- 20 Table S3** AUC values and AUC confidence intervals for the ROC curves of the analyzed binding site comparison methods for the ROCS dataset.
- 22 Table S4** AUC values and AUC confidence intervals for the ROC curves of the analyzed binding site comparison methods for the reduced ROCS dataset (only site pairs with a SiteHopper<sup>5</sup> PatchScore of more than 0.82 are classified as active site pairs).
- 24 Text S1** Discussion of the TM-align performance.
- 25 References**

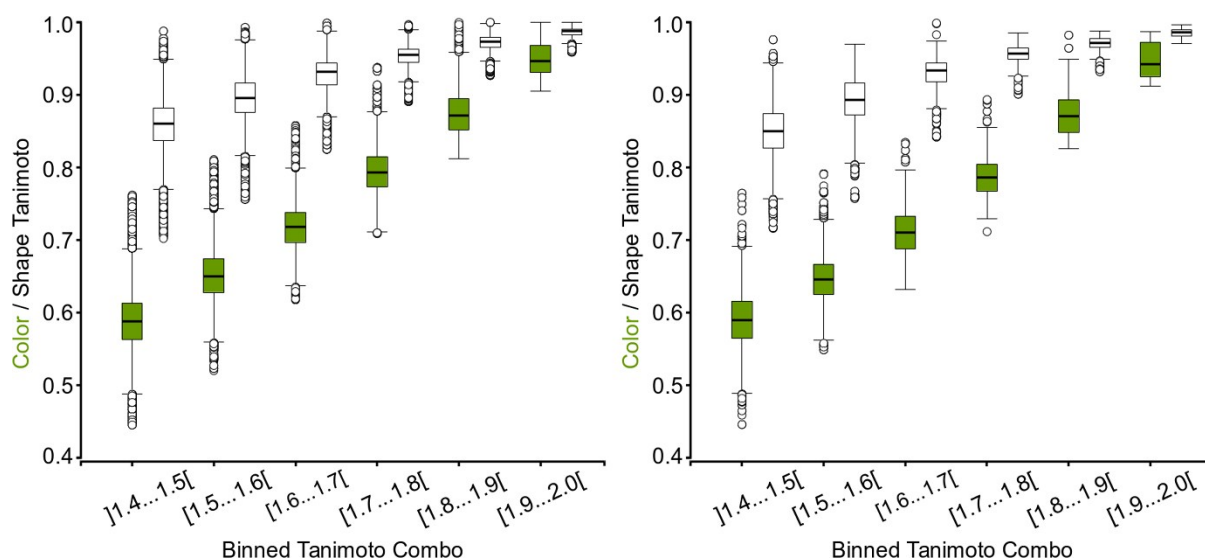

**Fig. S1** Boxplots of the Shape Tanimoto (white) and Color Tanimoto (green) for the binned Tanimoto Combo similarities of the ROCS<sup>1</sup>-based sc-PDB ligand comparisons. The left panel shows the similarities for all similarities (similar ligands), while the right panel presents the similarities for the subset of similar ligands binding to unrelated proteins.

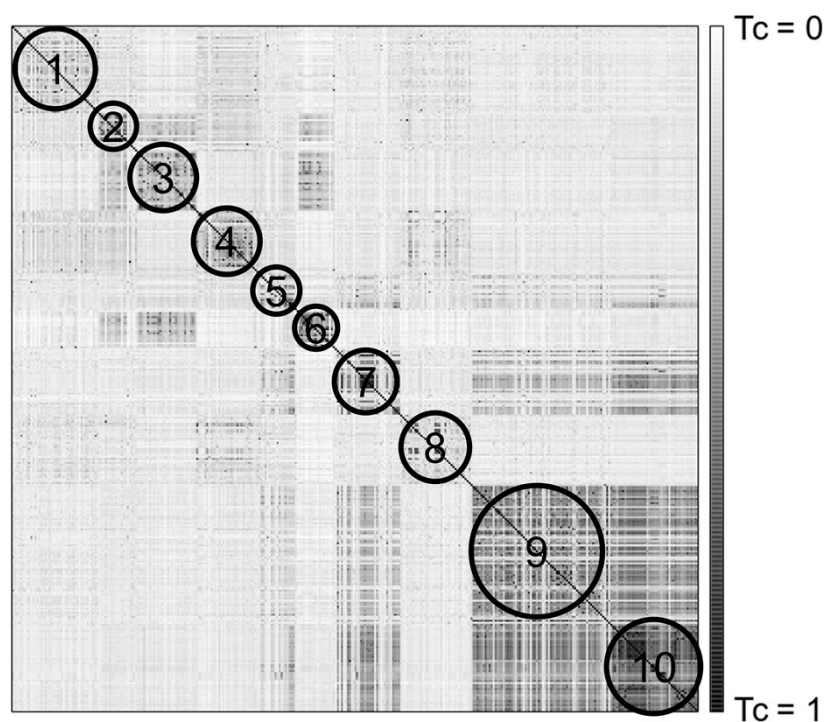

**Fig. S2** Similarity matrix of clusters of sc-PDB ligands with high shape and physicochemical similarities. The coloring corresponds to the molecular 2D similarity based on the Tanimoto coefficients ( $T_c$ ) between the ECFP4 fingerprints (black:  $T_c = 1$ , white:  $T_c = 0$ ).

| Overrepresented Target Classes |                                                           | Mean # Targets (PDB) |        | Mean # Targets (ChEMBL) |       |
|--------------------------------|-----------------------------------------------------------|----------------------|--------|-------------------------|-------|
|                                |                                                           | cluster              | value  | cluster                 | value |
| cluster 1                      | Enzymes, Proteases                                        | cluster 10           | 189.93 | cluster 4               | 18.83 |
| cluster 2                      | Nuclear Receptors, Transcription Factors                  | cluster 7            | 151.42 | cluster 3               | 11.77 |
| cluster 3                      | Nuclear Receptors, Transcription Factors                  | cluster 9            | 21.54  | cluster 1               | 8.70  |
| cluster 4                      | Nuclear Receptors, Transcription Factors, Protein Kinases | cluster 6            | 20.05  | cluster 2               | 7.45  |
| cluster 5                      | Enzymes, Transmembrane Transporters                       | cluster 5            | 13.11  | cluster 9               | 7.23  |
| cluster 6                      | Nuclear Receptors, Transcription Factors                  | cluster 4            | 8.58   | cluster 7               | 4.95  |
| cluster 7                      | Proteases, Enzymes                                        | cluster 3            | 6.03   | cluster 8               | 4.13  |
| cluster 8                      | Proteases, Enzymes                                        | cluster 1            | 4.86   | cluster 5               | 4.11  |
| cluster 9                      | GPCRs, Transcription Factors, Enzymes                     | cluster 2            | 3.05   | cluster 10              | 2.43  |
| cluster 10                     | Ion Channels, Transmembrane Transporters, Enzymes         | cluster 8            | 1.60   | cluster 6               | 2.18  |

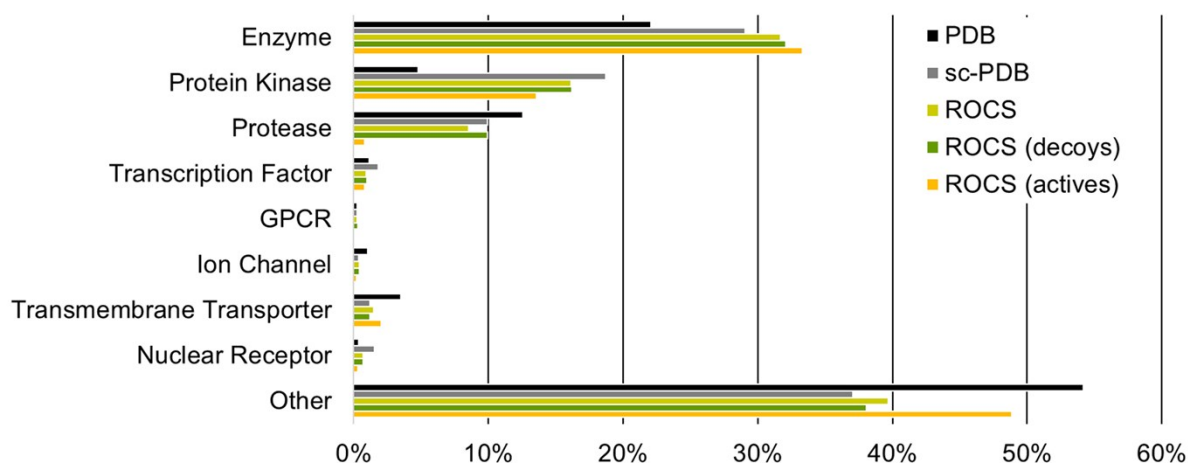

**Fig. S3** Distribution of targets in the ROCS dataset. Top: The overrepresented target families in the ligand clusters are shown on the left, while the mean number of targets per ligand cluster is given on the right. Bottom: The distribution of target families in the PDB, the sc-PDB, and the ROCS dataset.

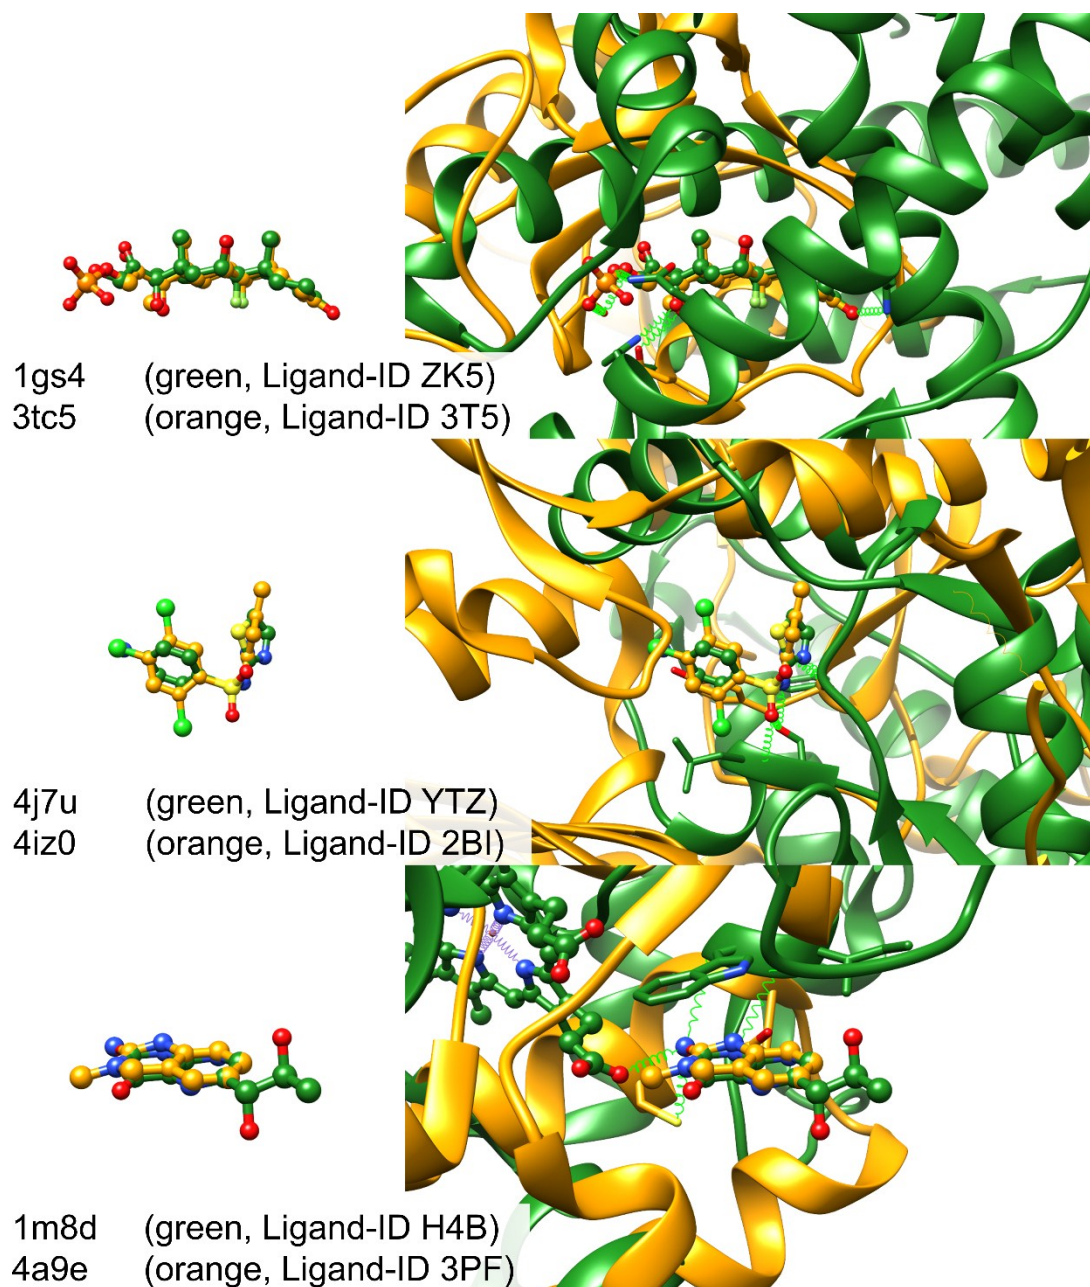

**Fig. S4** Ligand-based alignments of protein binding sites binding to similar ligands in similar conformations. The ligand alignments are presented on the left while the corresponding protein alignments are presented on the right. Green springs indicate hydrogen bonds between the protein and the ligand for ligand atoms which can be found in both ligands.

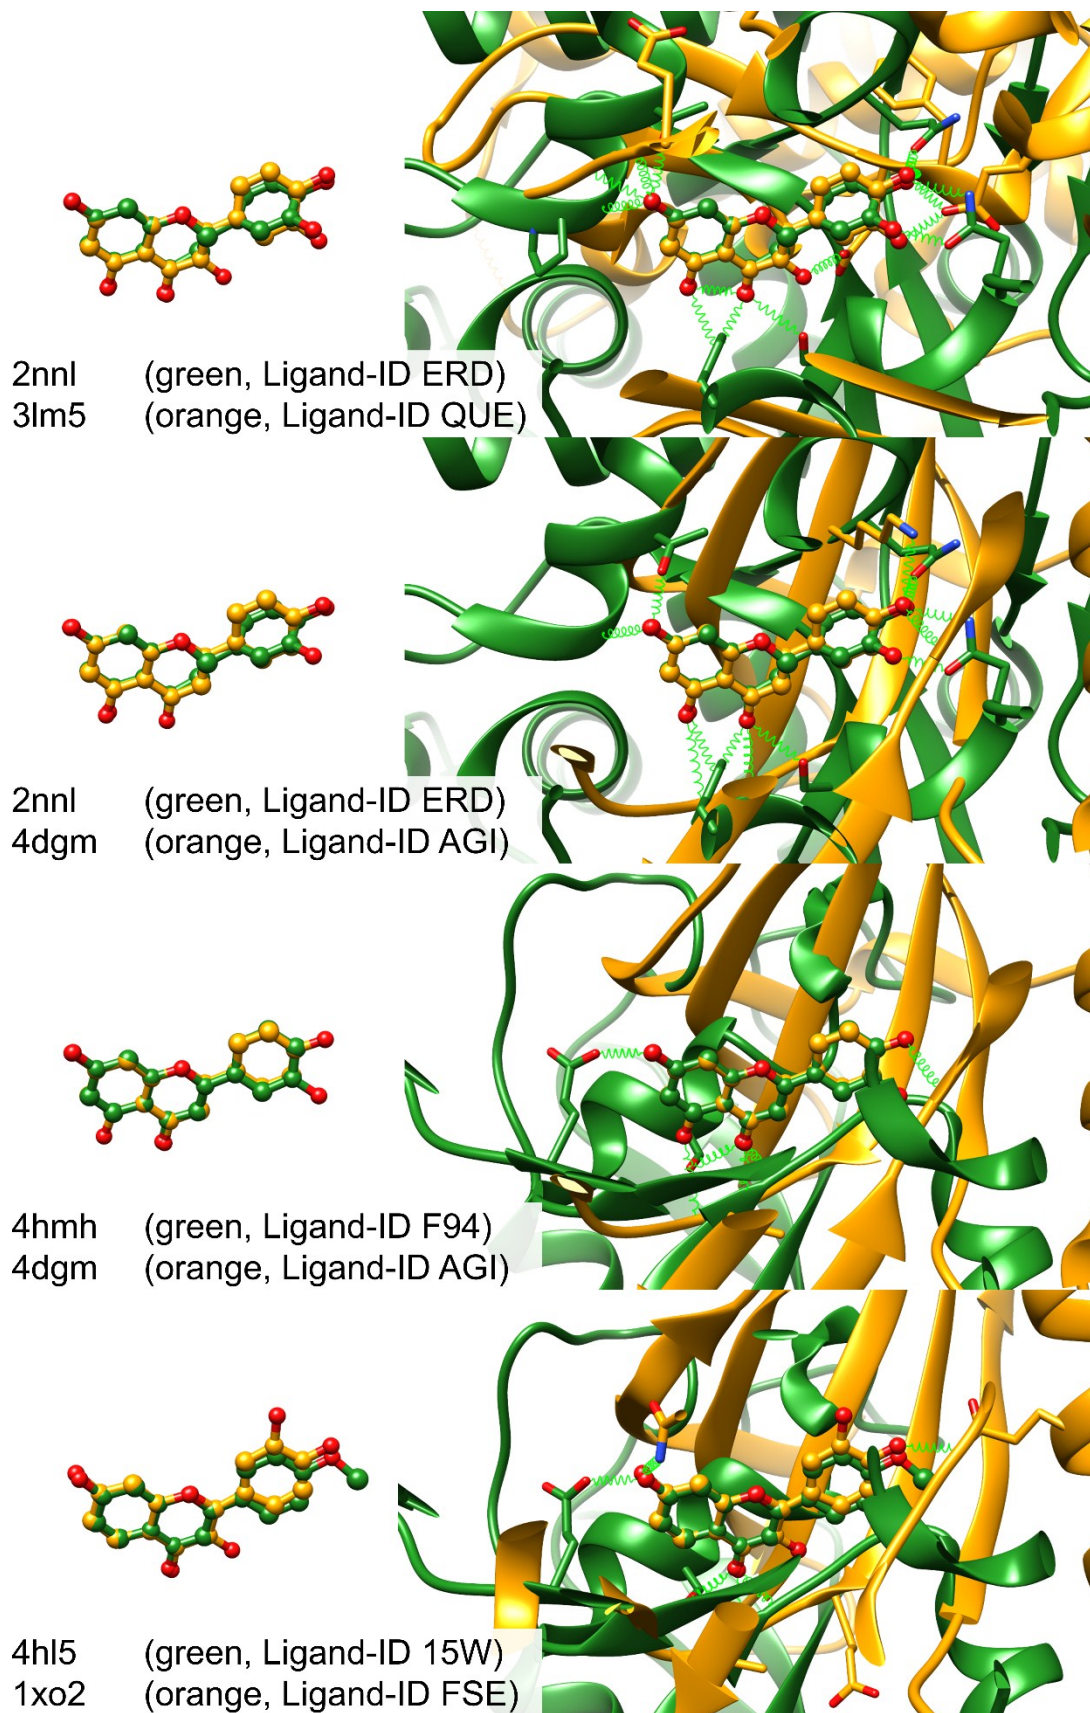

**Fig. S5** Ligand-based alignments of protein binding sites binding to similar flavone-related ligands in similar conformations. The ligand alignments are presented on the left while the corresponding protein alignments are presented on the right. Green springs indicate hydrogen bonds between the protein and the ligand for ligand atoms which can be found in both ligands.

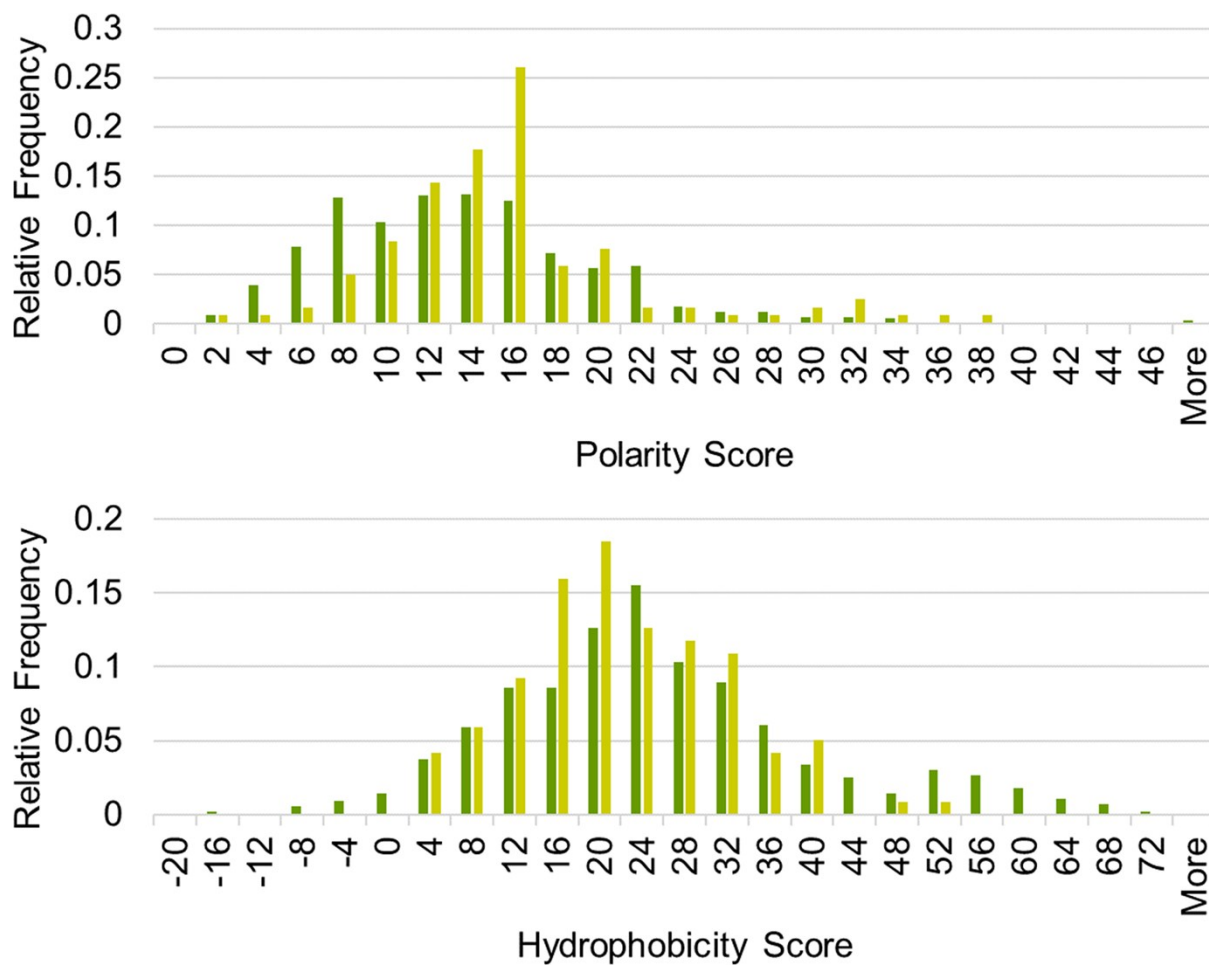

**Fig. S6** Distribution of the dpocket<sup>2</sup>-derived polarity and hydrophobicity scores for structures which are exclusively found in pairs with high shape and low physicochemical similarity (dark green bars) or in pairs with high shape and color similarity (light green bars).

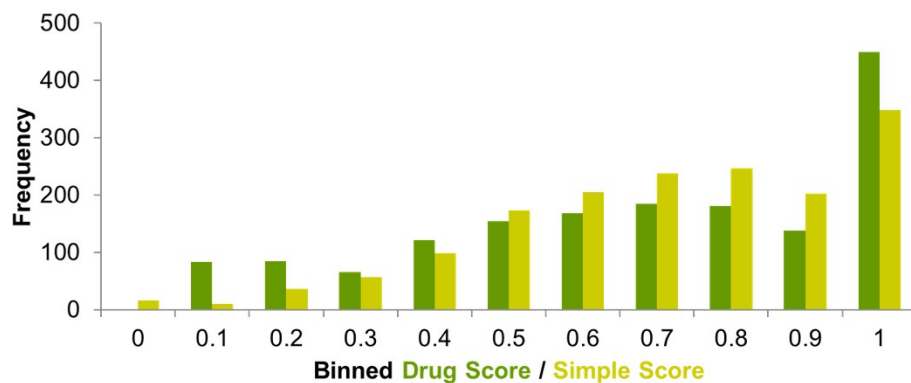

|            | Drug Score      |                    | Simple Score    |                    |
|------------|-----------------|--------------------|-----------------|--------------------|
|            | arithmetic mean | standard deviation | arithmetic mean | standard deviation |
| cluster 1  | 0.64            | 0.30               | 0.71            | 0.23               |
| cluster 2  | 0.76            | 0.23               | 0.80            | 0.19               |
| cluster 3  | 0.87            | 0.15               | 0.85            | 0.14               |
| cluster 4  | 0.73            | 0.24               | 0.75            | 0.20               |
| cluster 5  | 0.63            | 0.24               | 0.65            | 0.21               |
| cluster 6  | 0.83            | 0.17               | 0.82            | 0.14               |
| cluster 7  | 0.60            | 0.28               | 0.62            | 0.24               |
| cluster 8  | 0.71            | 0.24               | 0.73            | 0.19               |
| cluster 9  | 0.66            | 0.26               | 0.69            | 0.21               |
| cluster 10 | 0.62            | 0.31               | 0.65            | 0.25               |

**Fig. S7** DoGSite<sup>3</sup>-derived druggability for the sites in unrelated proteins binding to similar ligands in the ROCS dataset. Top: Distribution of the druggability scores for all sites. Bottom: Mean and standard deviation of the druggabilities for the ten clusters of ligands (see also Fig. 1 in the original publication).

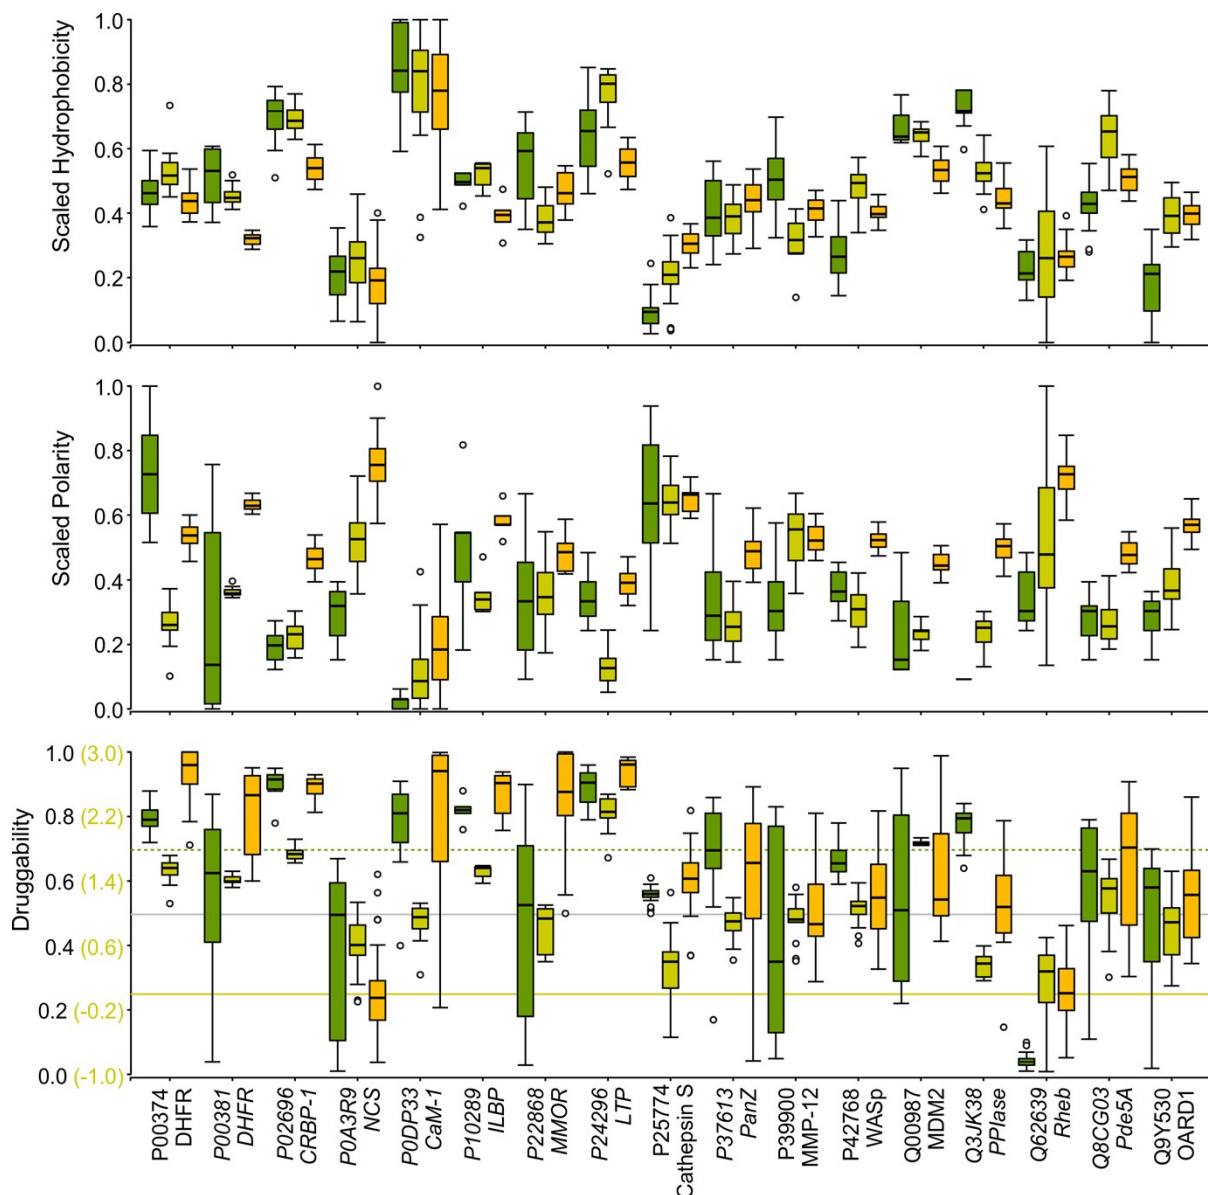

**Fig. S8** Box plots of the scaled hydrophobicity (top) and polarity (center) descriptors derived from analyses with fpocket<sup>2</sup> (dark green boxes), VolSite<sup>4</sup> (light green boxes), and DoGSite<sup>3</sup> (yellow boxes) together with the obtained druggability scores (bottom) for the NMR dataset. The cut-offs to distinguish between druggable and non-druggable sites are given as grey lines. The dashed line represents a stricter threshold for druggability predictions with fpocket. The threshold for VolSite predictions is 0 (light green line).



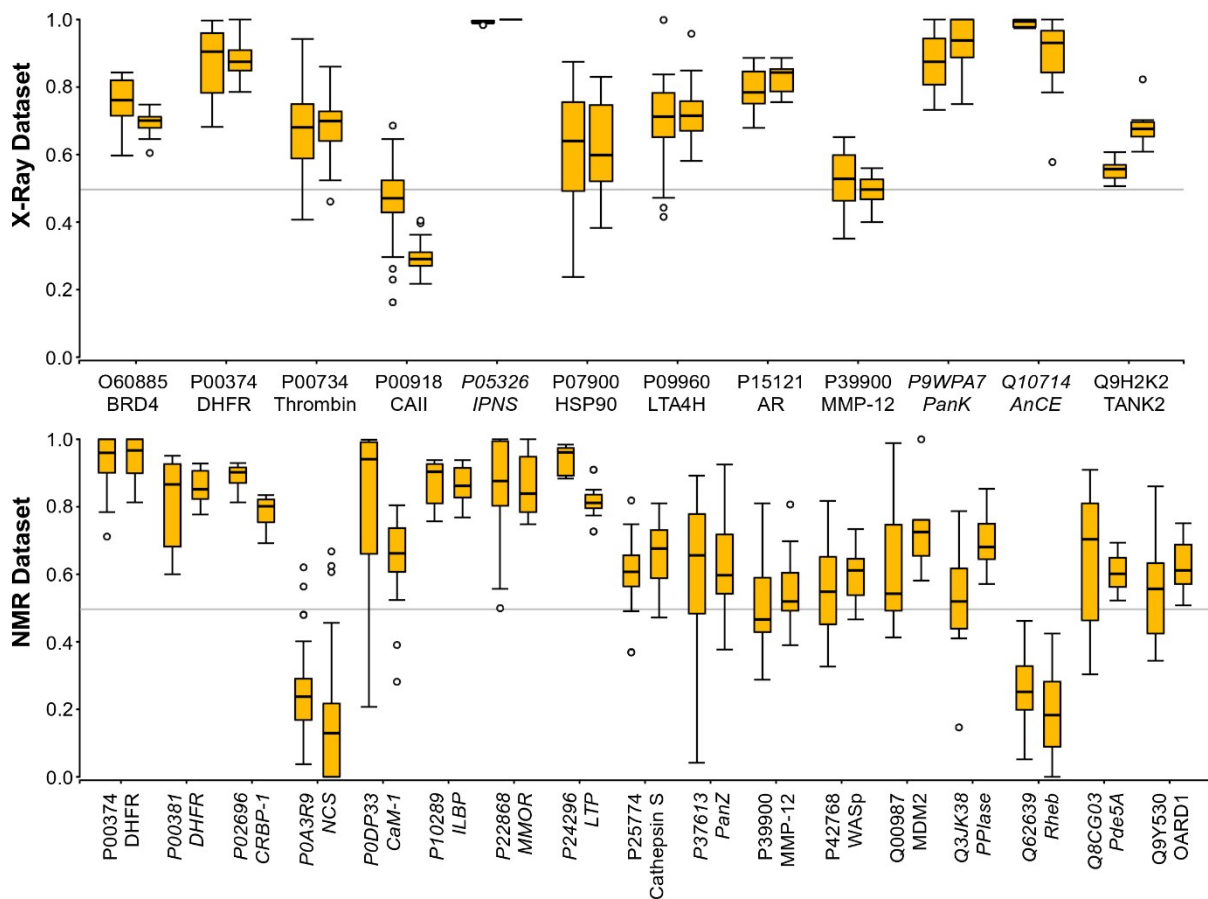

**Fig. S9** Boxplots of the DrugScore (left) and the SimpleScore (right) calculated with DoGSiteScorer<sup>3</sup> for the X-ray (top) and NMR (bottom) dataset.

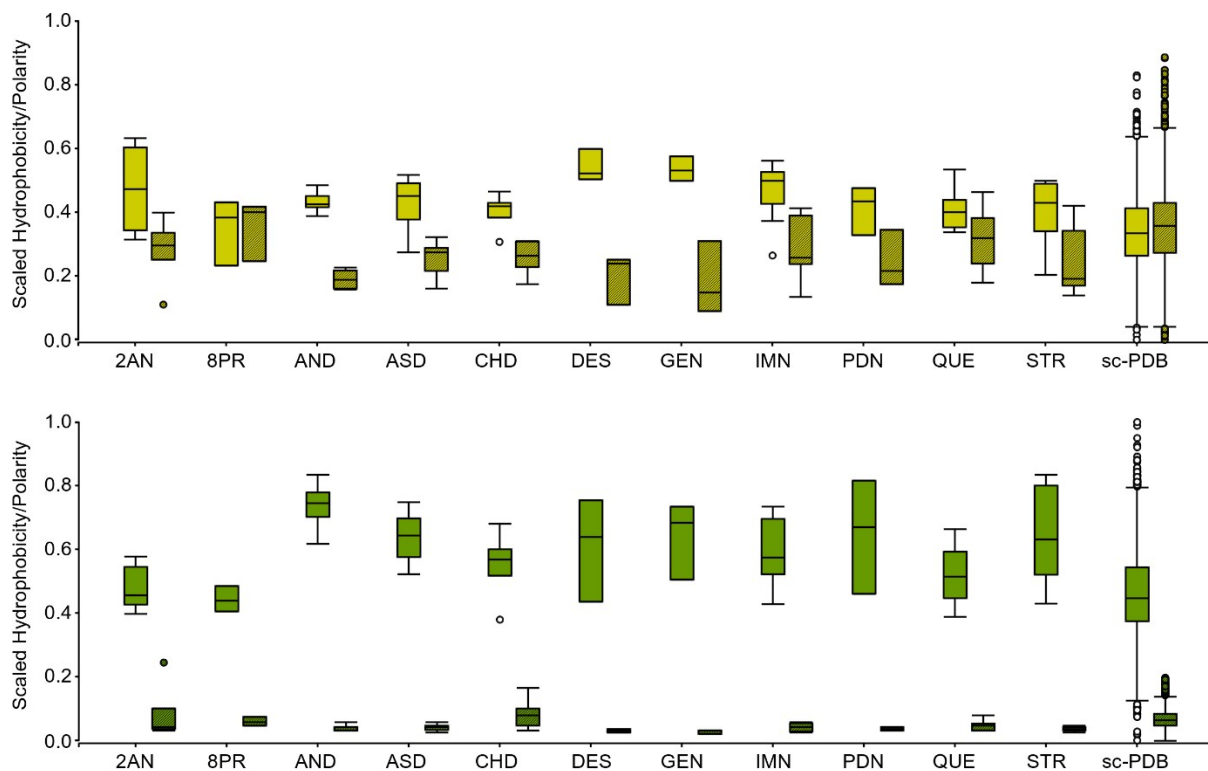

**Fig. S10** Boxplots of the scaled hydrophobicity and polarity values for the dissimilar, mainly hydrophobic binding sites in complex with different ligand types. The boxes with a solid fill represent the hydrophobicity and the hatch pattern-filled boxes the polarity of the sites. The upper chart presents the results of the VolSite<sup>4</sup> analysis (light green) and the lower chart presents the results of the fpocket<sup>2</sup> analysis (dark green). The corresponding ligand-IDs are given on the X-axis. The boxplot of the hydrophobicity and polarity in the complete sc-PDB is also given for comparison purposes.

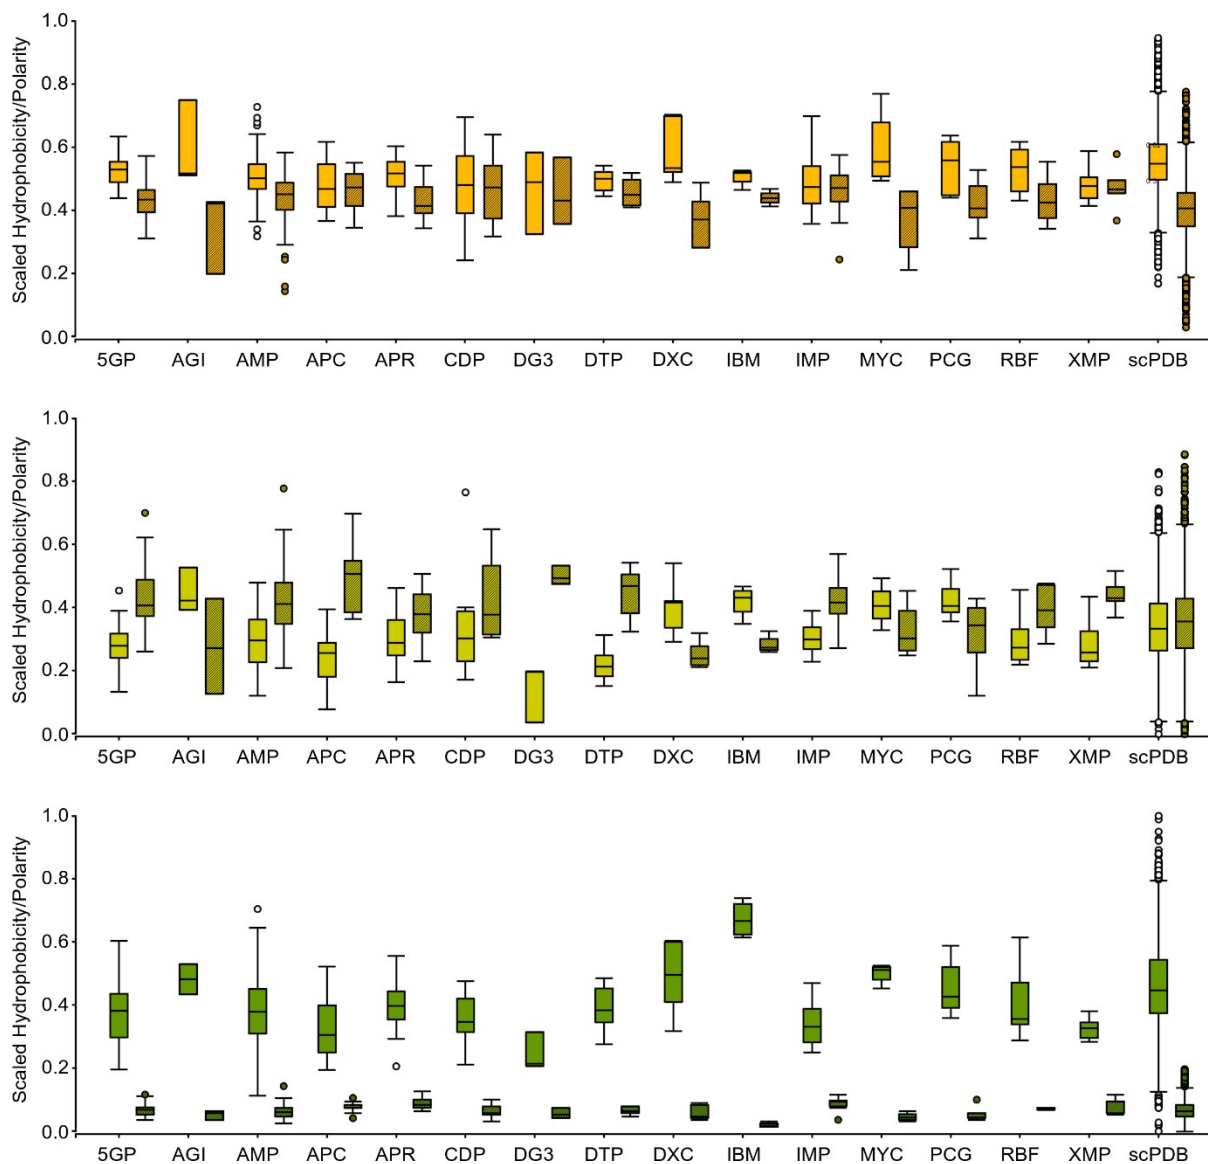

**Fig. S11** Boxplots of the scaled hydrophobicity and polarity values for the dissimilar binding sites of average hydrophobicity in complex with different ligand types. The boxes with a solid fill represent the hydrophobicity and the hatch pattern-filled boxes the polarity of the sites. The results obtained with DoGSite<sup>3</sup> (top, yellow), VolSite<sup>4</sup> (center, light green), and fpocket<sup>2</sup> (bottom, dark green) are presented. The corresponding ligand-IDs are given on the X-axis. The boxplot of the hydrophobicity and polarity in the complete sc-PDB is also given for comparison purposes.

**Table S1** The ten largest enzyme groups (according to the first two digits of the EC nomenclature) in the PDB, the sc-PDB, and the ROCS dataset. The ten largest classes per dataset are highlighted by an asterisk.

| EC Number | ROCS (actives) | ROCS (decoys) | ROCS   | sc-PDB | PDB    | Description                                                                                                                |
|-----------|----------------|---------------|--------|--------|--------|----------------------------------------------------------------------------------------------------------------------------|
| 1.1       | 8.88*          | 9.54*         | 9.16*  | 7.06*  | 3.12*  | dehydrogenases that act on primary alcohols, secondary alcohols, and hemi-acetals, e.g., L-lactate dehydrogenase           |
| 1.14      | 2.50           | 4.10*         | 3.79*  | 3.03*  | 3.53*  | enzymes that act on two hydrogen donors with incorporation or reduction of molecular oxygen, e.g., nitric-oxide synthase   |
| 1.2       | 2.84*          | 2.30          | 2.05   | 1.70   | 0.92   | enzymes that oxidize aldehydes, e.g., glyceraldehyde-3-phosphate dehydrogenase                                             |
| 1.3       | 2.59*          | 3.35*         | 3.13*  | 3.14*  | 1.27   | enzymes that introduce a double bond by dehydrogenation of a C-C single bond, e.g., enoyl-[acyl-carrier-protein] reductase |
| 1.5       | 1.21           | 2.56          | 2.38   | 2.86*  | 1.04   | enzymes that dehydrogenate secondary amines introducing a C-N double bond, e.g., dihydrofolate reductase                   |
| 1.8       | 2.59*          | 1.19          | 1.06   | 0.71   | 0.57   | enzymes that act either on inorganic substrates or organic thiols, e.g., dihydrolipoyl dehydrogenase                       |
| 2.1       | 9.31*          | 3.44*         | 4.56*  | 4.58*  | 2.88   | enzymes that transfer one-carbon groups, e.g., hydroxymethyl-, formyl-, and related transferases                           |
| 2.4       | 3.88*          | 5.03*         | 4.70*  | 4.54*  | 3.47*  | glycosyl transferases, e.g., ADP-ribosyltransferase (polymerizing)                                                         |
| 2.5       | 1.12           | 2.99*         | 2.80*  | 2.98*  | 2.19   | enzymes that transfer alkyl or related groups, e.g., 6,7-dimethyl-8-ribityllumazine synthase                               |
| 2.7       | 28.79*         | 26.48*        | 27.89* | 30.75* | 15.14* | enzymes that transfer phosphor-containing groups, e.g., serine/threonine protein kinase                                    |
| 3.1       | 4.31*          | 4.10*         | 4.04*  | 3.90*  | 8.03*  | enzymes that hydrolyze ester bonds, e.g., 3',5'-cyclic-nucleotide phosphodiesterase                                        |
| 3.2       | 0.43           | 2.09          | 1.82   | 1.68   | 7.06*  | glycosylases, e.g., lysozyme                                                                                               |
| 3.4       | 0.78           | 10.75*        | 9.47*  | 10.86* | 17.41* | enzymes that hydrolyze peptide bonds, e.g., thrombin                                                                       |
| 3.5       | 1.29           | 1.85          | 1.66   | 1.95   | 3.58*  | enzymes that hydrolyze amides, amidines, and other C-N bonds, but not peptide bonds, e.g., $\beta$ -lactamase              |
| 3.6       | 6.38*          | 1.64          | 2.53   | 2.42   | 3.37*  | enzymes that act on anhydrides, e.g., phosphatases                                                                         |
| 4.2       | 0.60           | 2.89*         | 2.57*  | 2.16   | 3.19*  | C-O lyases, e.g., carbonic anhydrase                                                                                       |
| 6.3       | 6.29*          | 1.85          | 2.42   | 2.56   | 1.96   | enzymes that form C-N bonds, e.g., glutamine synthetase                                                                    |

**Table S2** Typical antitargets in the similar cavity pairs of the ROCS dataset. Their characteristics, the proteins of pockets in complex with similar ligands, the SiteHopper scores, and known common inhibitors from the ChEMBL database are provided. Binding site matches are shown if the SiteHopper PatchScore was above 0.82 or we found at least one common inhibitor in the ChEMBL database.

| PDB ID.Chain  <br>Gene Name  <br>Organism  <br>UniProt Acc  <br>Ligand ID | PDB ID<br>Name<br>UniProt Acc                                        | PatchScore | Shape-<br>Tanimoto | Color-<br>Tanimoto | ChEMBL Ids    |
|---------------------------------------------------------------------------|----------------------------------------------------------------------|------------|--------------------|--------------------|---------------|
| 2ydo.A  <br>ADORA2A  <br><i>Homo sapiens</i>  <br>P29274  ADN             | 2aa0<br>Adenosine kinase<br>Q9TVW2                                   | 0.88       | 0.40               | 0.16               | CHEMBL477     |
|                                                                           | 1lik<br>Adenosine kinase<br>Q9TVW2                                   | 0.87       | 0.39               | 0.16               | CHEMBL477     |
|                                                                           | 2zoq<br>MAP kinase 3<br>P27361                                       | 0.86       | 0.39               | 0.15               | CHEMBL496     |
|                                                                           | 3kw2<br>Ribosomal RNA small subunit<br>methyltransferase E<br>B2RH75 | 0.85       | 0.41               | 0.15               |               |
|                                                                           | 1efp<br>Electron transfer flavoprotein B<br>P38975                   | 0.85       | 0.47               | 0.12               |               |
|                                                                           | 1yi4<br>Ser/Thr-protein kinase pim-1<br>P11309                       | 0.81       | 0.38               | 0.14               | CHEMBL455264  |
|                                                                           | 1muo<br>Aurora kinase A<br>O14965                                    | 0.77       | 0.34               | 0.14               | CHEMBL2010872 |
|                                                                           | 2eva<br>MAP kinase kinase kinase 7<br>O43318                         | 0.77       | 0.37               | 0.14               | CHEMBL477     |
|                                                                           | 2ivt<br>Tyr-protein kinase receptor Ret<br>P07949                    | 0.76       | 0.38               | 0.13               | CHEMBL2010872 |
|                                                                           | 1bx4<br>Adenosine kinase<br>P55263                                   | 0.73       | 0.37               | 0.12               | CHEMBL302376  |
|                                                                           | 2ivs<br>Tyr-protein kinase receptor Ret<br>P07949                    | 0.69       | 0.32               | 0.12               | CHEMBL2010872 |
| 1t7r.A  <br>AR  <br><i>Pan troglodytes</i>  <br>O97775  DHT               | 1lho<br>Sex hormone-binding globulin<br>P04278                       | 1.05       | 0.63               | 0.14               |               |
|                                                                           | 3klp<br>Estradiol 17-beta-dehydrogenase 1<br>P14061                  | 0.84       | 0.37               | 0.16               |               |
|                                                                           | 1jtv<br>Estradiol 17-beta-dehydrogenase 1<br>P14061                  | 0.83       | 0.39               | 0.15               |               |
|                                                                           | 1lhv<br>Sex hormone-binding globulin<br>P04278                       | 0.82       | 0.45               | 0.12               |               |

**Table S2 (continued)** Typical antitargets in the similar cavity pairs of the ROCS dataset. Their characteristics, the proteins of pockets in complex with similar ligands, the SiteHopper scores, and known common inhibitors from the ChEMBL database are provided. Binding site matches are shown if the SiteHopper PatchScore was above 0.82 or we found at least one common inhibitor in the ChEMBL database.

| PDB ID.Chain  <br>Gene Name  <br>Organism  <br>UniProt Acc  <br>Ligand ID | PDB ID<br>Name<br>UniProt Acc                       | PatchScore | Shape-<br>Tanimoto | Color-<br>Tanimoto     | ChEMBL Ids                                                                              |
|---------------------------------------------------------------------------|-----------------------------------------------------|------------|--------------------|------------------------|-----------------------------------------------------------------------------------------|
| 2qpy.A  <br>AR  <br><i>Mus musculus</i>  <br>P19091  DHT                  | 1lhu<br>Sex hormone-binding globulin<br>P04278      | 0.99       | 0.54               | 0.15                   | CHEMBL103,<br>CHEMBL27769                                                               |
|                                                                           | 1lho<br>Sex hormone-binding globulin<br>P04278      | 0.93       | 0.49               | 0.15                   | CHEMBL103,<br>CHEMBL27769                                                               |
|                                                                           | 1lhv<br>Sex hormone-binding globulin<br>P04278      | 0.84       | 0.42               | 0.14                   | CHEMBL103,<br>CHEMBL27769                                                               |
|                                                                           | 1d2s<br>Sex hormone-binding globulin<br>P04278      | 0.83       | 0.42               | 0.14                   | CHEMBL103,<br>CHEMBL27769                                                               |
| 1e3g.A  <br>AR  <br><i>Homo sapiens</i>  <br>P10275  R18                  | 1lho<br>Sex hormone-binding globulin<br>P04278      | 1.13       | 0.63               | 0.17                   | CHEMBL103,<br>CHEMBL135,<br>CHEMBL27769,<br>CHEMBL386630,<br>CHEMBL440283,<br>CHEMBL717 |
|                                                                           | 1lhu<br>Sex hormone-binding globulin<br>P04278      | 1.10       | 0.65               | 0.15                   | CHEMBL103,<br>CHEMBL135,<br>CHEMBL27769,<br>CHEMBL386630,<br>CHEMBL440283,<br>CHEMBL717 |
|                                                                           | 1lhv<br>Sex hormone-binding globulin<br>P04278      | 0.99       | 0.42               | 0.19                   | CHEMBL103,<br>CHEMBL135,<br>CHEMBL27769,<br>CHEMBL386630,<br>CHEMBL440283,<br>CHEMBL717 |
|                                                                           | 1fdu<br>Estradiol 17-beta-dehydrogenase 1<br>P14061 | 0.77       | 0.32               | 0.15                   | CHEMBL150,<br>CHEMBL28                                                                  |
|                                                                           | 1dht<br>Estradiol 17-beta-dehydrogenase 1<br>P14061 | 0.77       | 0.34               | 0.14                   | CHEMBL150,<br>CHEMBL28                                                                  |
|                                                                           | 1equ<br>Estradiol 17-beta-dehydrogenase 1<br>P14061 | 0.76       | 0.29               | 0.16                   | CHEMBL150,<br>CHEMBL28                                                                  |
|                                                                           | 3km0<br>Estradiol 17-beta-dehydrogenase 1<br>P14061 | 0.75       | 0.35               | 0.13                   | CHEMBL150,<br>CHEMBL28                                                                  |
| 3klp<br>Estradiol 17-beta-dehydrogenase 1<br>P14061                       | 0.74                                                | 0.33       | 0.14               | CHEMBL150,<br>CHEMBL28 |                                                                                         |

**Table S2 (continued)** Typical antitargets in the similar cavity pairs of the ROCS dataset. Their characteristics, the proteins of pockets in complex with similar ligands, the SiteHopper scores, and known common inhibitors from the ChEMBL database are provided. Binding site matches are shown if the SiteHopper PatchScore was above 0.82 or we found at least one common inhibitor in the ChEMBL database.

| PDB ID.Chain  <br>Gene Name  <br>Organism  <br>UniProt Acc  <br>Ligand ID | PDB ID<br>Name<br>UniProt Acc                       | PatchScore | Shape-<br>Tanimoto | Color-<br>Tanimoto | ChEMBL Ids                                                                              |
|---------------------------------------------------------------------------|-----------------------------------------------------|------------|--------------------|--------------------|-----------------------------------------------------------------------------------------|
| 1e3g.A  <br>AR  <br><i>Homo sapiens</i>  <br>P10275  R18                  | 1xf0<br>3-alpha-HSD type II, brain<br>P42330        | 0.74       | 0.32               | 0.14               | CHEMBL2023820,<br>CHEMBL717                                                             |
|                                                                           | 1qyx<br>Estradiol 17-beta-dehydrogenase 1<br>P14061 | 0.74       | 0.31               | 0.14               | CHEMBL150,<br>CHEMBL28                                                                  |
|                                                                           | 1jtv<br>Estradiol 17-beta-dehydrogenase 1<br>P14061 | 0.71       | 0.34               | 0.13               | CHEMBL150,<br>CHEMBL28                                                                  |
|                                                                           | 2ipj<br>HAKRD<br>P52895                             | 0.58       | 0.28               | 0.10               | CHEMBL2023820,<br>CHEMBL717                                                             |
| 2amb.A  <br>AR  <br><i>Homo sapiens</i>  <br>P10275  17H                  | 1lho<br>Sex hormone-binding globulin<br>P04278      | 0.98       | 0.45               | 0.18               | CHEMBL103,<br>CHEMBL135,<br>CHEMBL27769,<br>CHEMBL386630,<br>CHEMBL440283,<br>CHEMBL717 |
|                                                                           | 1d2s<br>Sex hormone-binding globulin<br>P04278      | 0.93       | 0.38               | 0.18               | CHEMBL103,<br>CHEMBL135,<br>CHEMBL27769,<br>CHEMBL386630,<br>CHEMBL440283,<br>CHEMBL717 |
|                                                                           | 1lhv<br>Sex hormone-binding globulin<br>P04278      | 0.83       | 0.42               | 0.14               | CHEMBL103,<br>CHEMBL135,<br>CHEMBL27769,<br>CHEMBL386630,<br>CHEMBL440283,<br>CHEMBL717 |
|                                                                           | 1qyx<br>Estradiol 17-beta-dehydrogenase 1<br>P14061 | 0.80       | 0.36               | 0.14               | CHEMBL150,<br>CHEMBL28                                                                  |
|                                                                           | 1qyw<br>Estradiol 17-beta-dehydrogenase 1<br>P14061 | 0.79       | 0.36               | 0.14               | CHEMBL150,<br>CHEMBL28                                                                  |
|                                                                           | 1fdu<br>Estradiol 17-beta-dehydrogenase 1<br>P14061 | 0.79       | 0.35               | 0.14               | CHEMBL150,<br>CHEMBL28                                                                  |
|                                                                           | 3klp<br>Estradiol 17-beta-dehydrogenase 1<br>P14061 | 0.76       | 0.37               | 0.13               | CHEMBL150,<br>CHEMBL28                                                                  |
|                                                                           | 1jtv<br>Estradiol 17-beta-dehydrogenase 1<br>P14061 | 0.75       | 0.35               | 0.13               | CHEMBL150,<br>CHEMBL28                                                                  |

**Table S2 (continued)** Typical antitargets in the similar cavity pairs of the ROCS dataset. Their characteristics, the proteins of pockets in complex with similar ligands, the SiteHopper scores, and known common inhibitors from the ChEMBL database are provided. Binding site matches are shown if the SiteHopper PatchScore was above 0.82 or we found at least one common inhibitor in the ChEMBL database.

| PDB ID.Chain  <br>Gene Name  <br>Organism  <br>UniProt Acc  <br>Ligand ID | PDB ID<br>Name<br>UniProt Acc                       | PatchScore | Shape-<br>Tanimoto | Color-<br>Tanimoto | ChEMBL Ids                                                                              |
|---------------------------------------------------------------------------|-----------------------------------------------------|------------|--------------------|--------------------|-----------------------------------------------------------------------------------------|
| 2oz7.A  <br>AR  <br><i>Homo sapiens</i>  <br>P10275  CA4                  | 1d2s<br>Sex hormone-binding globulin<br>P04278      | 0.89       | 0.47               | 0.14               | CHEMBL103,<br>CHEMBL135,<br>CHEMBL27769,<br>CHEMBL386630,<br>CHEMBL440283,<br>CHEMBL717 |
|                                                                           | 1qyw<br>Estradiol 17-beta-dehydrogenase 1<br>P14061 | 0.85       | 0.34               | 0.17               | CHEMBL150,<br>CHEMBL28                                                                  |
|                                                                           | 1qyx<br>Estradiol 17-beta-dehydrogenase 1<br>P14061 | 0.74       | 0.36               | 0.13               | CHEMBL150,<br>CHEMBL28                                                                  |
|                                                                           | 1jtv<br>Estradiol 17-beta-dehydrogenase 1<br>P14061 | 0.74       | 0.37               | 0.12               | CHEMBL150,<br>CHEMBL28                                                                  |
| 3l3z.A  <br>AR  <br><i>Homo sapiens</i>  <br>P10275  DHT                  | 1lhu<br>Sex hormone-binding globulin<br>P04278      | 1.18       | 0.68               | 0.17               | CHEMBL103,<br>CHEMBL135,<br>CHEMBL27769,<br>CHEMBL386630,<br>CHEMBL440283,<br>CHEMBL717 |
|                                                                           | 1lho<br>Sex hormone-binding globulin<br>P04278      | 1.11       | 0.63               | 0.16               | CHEMBL103,<br>CHEMBL135,<br>CHEMBL27769,<br>CHEMBL386630,<br>CHEMBL440283,<br>CHEMBL717 |
|                                                                           | 1lhv<br>Sex hormone-binding globulin<br>P04278      | 0.99       | 0.42               | 0.19               | CHEMBL103,<br>CHEMBL135,<br>CHEMBL27769,<br>CHEMBL386630,<br>CHEMBL440283,<br>CHEMBL717 |
|                                                                           | 1fdu<br>Estradiol 17-beta-dehydrogenase 1<br>P14061 | 0.90       | 0.27               | 0.21               | CHEMBL150,<br>CHEMBL28                                                                  |
|                                                                           | 1dht<br>Estradiol 17-beta-dehydrogenase 1<br>P14061 | 0.81       | 0.32               | 0.16               | CHEMBL150,<br>CHEMBL28                                                                  |
|                                                                           | 1qyx<br>Estradiol 17-beta-dehydrogenase 1<br>P14061 | 0.77       | 0.35               | 0.14               | CHEMBL150,<br>CHEMBL28                                                                  |
|                                                                           | 1jtv<br>Estradiol 17-beta-dehydrogenase 1<br>P14061 | 0.77       | 0.38               | 0.13               | CHEMBL150,<br>CHEMBL28                                                                  |



**Table S2 (continued)** Typical antitargets in the similar cavity pairs of the ROCS dataset. Their characteristics, the proteins of pockets in complex with similar ligands, the SiteHopper scores, and known common inhibitors from the ChEMBL database are provided. Binding site matches are shown if the SiteHopper PatchScore was above 0.82 or we found at least one common inhibitor in the ChEMBL database.

| PDB ID.Chain  <br>Gene Name  <br>Organism  <br>UniProt Acc  <br>Ligand ID | PDB ID<br>Name<br>UniProt Acc                       | PatchScore | Shape-<br>Tanimoto | Color-<br>Tanimoto | ChEMBL Ids                                                                              |
|---------------------------------------------------------------------------|-----------------------------------------------------|------------|--------------------|--------------------|-----------------------------------------------------------------------------------------|
| 3l3z.A  <br>AR  <br><i>Homo sapiens</i>  <br>P10275  DHT                  | 3km0<br>Estradiol 17-beta-dehydrogenase 1<br>P14061 | 0.77       | 0.35               | 0.14               | CHEMBL150,<br>CHEMBL28                                                                  |
|                                                                           | 3klp<br>Estradiol 17-beta-dehydrogenase 1<br>P14061 | 0.76       | 0.36               | 0.13               | CHEMBL150,<br>CHEMBL28                                                                  |
|                                                                           | 1xf0<br>3-alpha-HSD type II, brain<br>P42330        | 0.75       | 0.33               | 0.14               | CHEMBL2023820,<br>CHEMBL717                                                             |
|                                                                           | 1qyw<br>Estradiol 17-beta-dehydrogenase 1<br>P14061 | 0.71       | 0.36               | 0.12               | CHEMBL150,<br>CHEMBL28                                                                  |
| 3zqt.A  <br>AR  <br><i>Homo sapiens</i>  <br>P10275  TES                  | 1lho<br>Sex hormone-binding globulin<br>P04278      | 0.99       | 0.54               | 0.15               | CHEMBL103,<br>CHEMBL135,<br>CHEMBL27769,<br>CHEMBL386630,<br>CHEMBL440283,<br>CHEMBL717 |
|                                                                           | 1lhu<br>Sex hormone-binding globulin<br>P04278      | 0.98       | 0.53               | 0.15               | CHEMBL103,<br>CHEMBL135,<br>CHEMBL27769,<br>CHEMBL386630,<br>CHEMBL440283,<br>CHEMBL717 |
|                                                                           | 1d2s<br>Sex hormone-binding globulin<br>P04278      | 0.88       | 0.45               | 0.14               | CHEMBL103,<br>CHEMBL135,<br>CHEMBL27769,<br>CHEMBL386630,<br>CHEMBL440283,<br>CHEMBL717 |
|                                                                           | 1lhv<br>Sex hormone-binding globulin<br>P04278      | 0.88       | 0.41               | 0.16               | CHEMBL103,<br>CHEMBL135,<br>CHEMBL27769,<br>CHEMBL386630,<br>CHEMBL440283,<br>CHEMBL717 |
|                                                                           | 3klp<br>Estradiol 17-beta-dehydrogenase 1<br>P14061 | 0.80       | 0.34               | 0.15               | CHEMBL150,<br>CHEMBL28                                                                  |
|                                                                           | 1fdu<br>Estradiol 17-beta-dehydrogenase 1<br>P14061 | 0.75       | 0.35               | 0.13               | CHEMBL150,<br>CHEMBL28                                                                  |
|                                                                           | 1xf0<br>3-alpha-HSD type II, brain<br>P42330        | 0.73       | 0.34               | 0.13               | CHEMBL2023820,<br>CHEMBL717                                                             |

**Table S2 (continued)** Typical antitargets in the similar cavity pairs of the ROCS dataset. Their characteristics, the proteins of pockets in complex with similar ligands, the SiteHopper scores, and known common inhibitors from the ChEMBL database are provided. Binding site matches are shown if the SiteHopper PatchScore was above 0.82 or we found at least one common inhibitor in the ChEMBL database.

| PDB ID.Chain  <br>Gene Name  <br>Organism  <br>UniProt Acc  <br>Ligand ID | PDB ID<br>Name<br>UniProt Acc                                      | PatchScore | Shape-<br>Tanimoto | Color-<br>Tanimoto | ChEMBL Ids                                                                                           |
|---------------------------------------------------------------------------|--------------------------------------------------------------------|------------|--------------------|--------------------|------------------------------------------------------------------------------------------------------|
| 3zqt.A  <br>AR  <br><i>Homo sapiens</i>  <br>P10275   TES                 | 3km0<br>Estradiol 17-beta-dehydrogenase 1<br>P14061                | 0.72       | 0.37               | 0.12               | CHEMBL150,<br>CHEMBL28                                                                               |
|                                                                           | 1qyx<br>Estradiol 17-beta-dehydrogenase 1<br>P14061                | 0.70       | 0.37               | 0.11               | CHEMBL150,<br>CHEMBL28                                                                               |
|                                                                           | 1qyw<br>Estradiol 17-beta-dehydrogenase 1<br>P14061                | 0.67       | 0.34               | 0.11               | CHEMBL150,<br>CHEMBL28                                                                               |
| 1j99.A  <br>SULT2A1  <br><i>Homo sapiens</i>  <br>Q06520   AND            | 1eup<br>6-deoxyerythronolide B hydroxylase<br>Q00441               | 0.89       | 0.39               | 0.17               |                                                                                                      |
| 2pw3.B  <br>PDE4D  <br><i>Homo sapiens</i>  <br>Q08499   CMP              | 1ykd<br>Adenylate cyclase<br>P94182                                | 0.82       | 0.39               | 0.14               |                                                                                                      |
| 1ptw.D  <br>PDE4D  <br><i>Homo sapiens</i>  <br>Q08499   AMP              | 3t9f<br>diphosphoinositol-<br>pentakisphosphate kinase 2<br>O43314 | 0.83       | 0.40               | 0.14               |                                                                                                      |
|                                                                           | 2q8m<br>Fructose-1,6-bisphosphatase class 1<br>P0A993              | 0.82       | 0.35               | 0.16               |                                                                                                      |
| 4jvl.B  <br>SULT1E1  <br><i>Homo sapiens</i>  <br>P49888   EST            | 1lhu<br>Sex hormone-binding globulin<br>P04278                     | 0.82       | 0.28               | 0.18               |                                                                                                      |
| 1xv9.B  <br>NR1I3  <br><i>Homo sapiens</i>  <br>Q14994   CI2              | 3s79<br>Cytochrome P450 19A1<br>P11511                             | 0.92       | 0.32               | 0.20               | CHEMBL104                                                                                            |
| 3n8y.A  <br>PTGS1  <br><i>Ovis aries</i>  <br>P05979   DIF                | 3r6i<br>3-alpha-HSD type II, brain<br>P42330                       | 0.73       | 0.34               | 0.13               | CHEMBL1034,<br>CHEMBL154,<br>CHEMBL2323476,<br>CHEMBL2323522,<br>CHEMBL509,<br>CHEMBL563,<br>CHEMBL6 |
| 4oty.A  <br>PTGS2  <br><i>Mus musculus</i>  <br>Q05769   LUR              | 3r6i<br>3-alpha-HSD type II, brain<br>P42330                       | 0.79       | 0.38               | 0.14               | CHEMBL2323476,<br>CHEMBL2323508,<br>CHEMBL503179,<br>CHEMBL509,<br>CHEMBL563,<br>CHEMBL6             |

**Table S2 (continued)** Typical antitargets in the similar cavity pairs of the ROCS dataset. Their characteristics, the proteins of pockets in complex with similar ligands, the SiteHopper scores, and known common inhibitors from the ChEMBL database are provided. Binding site matches are shown if the SiteHopper PatchScore was above 0.82 or we found at least one common inhibitor in the ChEMBL database.

| PDB ID.Chain  <br>Gene Name  <br>Organism  <br>UniProt Acc  <br>Ligand ID | PDB ID<br>Name<br>UniProt Acc                  | PatchScore | Shape-<br>Tanimoto | Color-<br>Tanimoto | ChEMBL Ids              |
|---------------------------------------------------------------------------|------------------------------------------------|------------|--------------------|--------------------|-------------------------|
| 2d06.B  <br>SULT1A1  <br><i>Homo sapiens</i>  <br>P50225   EST            | 1lhw<br>Sex hormone-binding globulin<br>P04278 | 0.71       | 0.35               | 0.12               | CHEMBL135,<br>CHEMBL691 |
|                                                                           | 1lhn<br>Sex hormone-binding globulin<br>P04278 | 0.70       | 0.39               | 0.10               | CHEMBL135,<br>CHEMBL691 |

**Table S3** AUC values and AUC confidence intervals for the ROC curves of the analyzed binding site comparison methods for the ROCS dataset. The pairwise AUC differences and the corresponding p-values were calculated according to DeLong and co-workers<sup>6</sup>.

|                          | Cavbase | FuzCav (PDB) | FuzCav | Grim (PDB) | Grim  | IsoMIF | KRIPO | PocketMatc <sub>n</sub> | ProBiS | RAPMAD |
|--------------------------|---------|--------------|--------|------------|-------|--------|-------|-------------------------|--------|--------|
| AUC                      | 0.58    | 0.57         | 0.57   | 0.77       | 0.75  | 0.97   | 0.93  | 0.79                    | 0.52   | 0.60   |
| CI                       | 0.58-   | 0.56-        | 0.57-  | 0.77-      | 0.74- | 0.97-  | 0.93- | 0.79-                   | 0.52-  | 0.60-  |
|                          | 0.59    | 0.57         | 0.58   | 0.78       | 0.75  | 0.97   | 0.93  | 0.80                    | 0.53   | 0.61   |
|                          | 0.00    | -0.02        | -0.01  | 0.19       | 0.16  | 0.39   | 0.34  | 0.21                    | -0.06  | 0.02   |
| Cavbase                  | 1.00    | 0.00         | 0.00   | 0.00       | 0.00  | 0.00   | 0.00  | 0.00                    | 0.00   | 0.00   |
|                          | 0.02    | 0.00         | 0.00   | 0.20       | 0.18  | 0.40   | 0.36  | 0.22                    | -0.05  | 0.03   |
| FuzCav (PDB)             | 0.00    | 1.00         | 0.38   | 0.00       | 0.00  | 0.00   | 0.00  | 0.00                    | 0.00   | 0.00   |
|                          | 0.01    | 0.00         | 0.00   | 0.20       | 0.17  | 0.40   | 0.35  | 0.22                    | -0.05  | 0.03   |
| FuzCav                   | 0.00    | 0.38         | 1.00   | 0.00       | 0.00  | 0.00   | 0.00  | 0.00                    | 0.00   | 0.00   |
|                          | -0.19   | -0.20        | -0.20  | 0.00       | -0.03 | 0.20   | 0.15  | 0.02                    | -0.25  | -0.17  |
| Grim (PDB)               | 0.00    | 0.00         | 0.00   | 1.00       | 0.00  | 0.00   | 0.00  | 0.00                    | 0.00   | 0.00   |
|                          | -0.16   | -0.18        | -0.17  | 0.03       | 0.00  | 0.23   | 0.18  | 0.04                    | -0.22  | -0.14  |
| Grim                     | 0.00    | 0.00         | 0.00   | 0.00       | 1.00  | 0.00   | 0.00  | 0.00                    | 0.00   | 0.00   |
|                          | -0.39   | -0.40        | -0.40  | -0.20      | -0.23 | 0.00   | -0.05 | -0.18                   | -0.45  | -0.37  |
| IsoMIF                   | 0.00    | 0.00         | 0.00   | 0.00       | 0.00  | 1.00   | 0.00  | 0.00                    | 0.00   | 0.00   |
|                          | -0.34   | -0.36        | -0.35  | -0.15      | -0.18 | 0.05   | 0.00  | -0.14                   | -0.40  | -0.32  |
| KRIPO                    | 0.00    | 0.00         | 0.00   | 0.00       | 0.00  | 0.00   | 1.00  | 0.00                    | 0.00   | 0.00   |
|                          | -0.21   | -0.22        | -0.22  | -0.02      | -0.04 | 0.18   | 0.14  | 0.00                    | -0.27  | -0.19  |
| PocketMatch              | 0.00    | 0.00         | 0.00   | 0.00       | 0.00  | 0.00   | 0.00  | 1.00                    | 0.00   | 0.00   |
|                          | 0.06    | 0.05         | 0.05   | 0.25       | 0.22  | 0.45   | 0.40  | 0.27                    | 0.00   | 0.08   |
| ProBiS                   | 0.00    | 0.00         | 0.00   | 0.00       | 0.00  | 0.00   | 0.00  | 0.00                    | 1.00   | 0.00   |
|                          | -0.02   | -0.03        | -0.03  | 0.17       | 0.14  | 0.37   | 0.32  | 0.19                    | -0.08  | 0.00   |
| RAPMAD                   | 0.00    | 0.00         | 0.00   | 0.00       | 0.00  | 0.00   | 0.00  | 0.00                    | 0.00   | 1.00   |
|                          | -0.11   | -0.13        | -0.13  | 0.08       | 0.05  | 0.27   | 0.23  | 0.09                    | -0.18  | -0.10  |
| VolSite/<br>Shaper (PDB) | 0.00    | 0.00         | 0.00   | 0.00       | 0.00  | 0.00   | 0.00  | 0.00                    | 0.00   | 0.00   |
|                          | -0.10   | -0.11        | -0.11  | 0.09       | 0.07  | 0.29   | 0.25  | 0.11                    | -0.16  | -0.08  |
| VolSite/<br>Shaper       | 0.00    | 0.00         | 0.00   | 0.00       | 0.00  | 0.00   | 0.00  | 0.00                    | 0.00   | 0.00   |
|                          | -0.09   | -0.11        | -0.10  | 0.10       | 0.07  | 0.30   | 0.25  | 0.11                    | -0.15  | -0.07  |
| Shaper (PDB)             | 0.00    | 0.00         | 0.00   | 0.00       | 0.00  | 0.00   | 0.00  | 0.00                    | 0.00   | 0.00   |
|                          | -0.08   | -0.10        | -0.10  | 0.11       | 0.08  | 0.30   | 0.26  | 0.12                    | -0.14  | -0.06  |
| Shaper                   | 0.00    | 0.00         | 0.00   | 0.00       | 0.00  | 0.00   | 0.00  | 0.00                    | 0.00   | 0.00   |
|                          | 0.13    | 0.11         | 0.11   | 0.32       | 0.29  | 0.51   | 0.47  | 0.33                    | 0.07   | 0.14   |
| SiteAlign                | 0.00    | 0.00         | 0.00   | 0.00       | 0.00  | 0.00   | 0.00  | 0.00                    | 0.00   | 0.00   |
|                          | 0.03    | 0.01         | 0.02   | 0.22       | 0.19  | 0.42   | 0.37  | 0.24                    | -0.03  | 0.05   |
| SiteEngine               | 0.00    | 0.00         | 0.00   | 0.00       | 0.00  | 0.00   | 0.00  | 0.00                    | 0.00   | 0.00   |
|                          | -0.38   | -0.40        | -0.40  | -0.19      | -0.22 | 0.00   | -0.04 | -0.18                   | -0.45  | -0.37  |
| SiteHopper               | 0.00    | 0.00         | 0.00   | 0.00       | 0.00  | 0.06   | 0.00  | 0.00                    | 0.00   | 0.00   |
|                          | 0.03    | 0.01         | 0.01   | 0.22       | 0.19  | 0.41   | 0.37  | 0.23                    | -0.03  | 0.04   |
| SMAP                     | 0.00    | 0.00         | 0.00   | 0.00       | 0.00  | 0.00   | 0.00  | 0.00                    | 0.00   | 0.00   |
|                          | -0.03   | -0.04        | -0.04  | 0.16       | 0.13  | 0.36   | 0.32  | 0.18                    | -0.09  | -0.01  |
| TIFP (PDB)               | 0.00    | 0.00         | 0.00   | 0.00       | 0.00  | 0.00   | 0.00  | 0.00                    | 0.00   | 0.02   |
|                          | 0.01    | -0.01        | 0.00   | 0.20       | 0.17  | 0.40   | 0.35  | 0.21                    | -0.05  | 0.03   |
| TIFP                     | 0.03    | 0.08         | 0.35   | 0.00       | 0.00  | 0.00   | 0.00  | 0.00                    | 0.00   | 0.00   |
|                          | -0.20   | -0.22        | -0.21  | -0.01      | -0.04 | 0.19   | 0.14  | 0.00                    | -0.26  | -0.18  |
| TM-align                 | 0.00    | 0.00         | 0.00   | 0.00       | 0.00  | 0.00   | 0.00  | 0.29                    | 0.00   | 0.00   |

**Table S3 (continued)** AUC values and AUC confidence intervals for the ROC curves of the analyzed binding site comparison methods for the ROCS dataset. The pairwise AUC differences and the corresponding p-values were calculated according to DeLong and co-workers<sup>6</sup>.

|                          | VolSite/<br>Shaper (PDB) | VolSite/<br>Shaper | Shaper (PDB)  | Shaper        | SiteAlign     | SiteEngine    | SiteHopper    | SMAP          | TIFP (PDB)    | TIFP          | TM-align      |
|--------------------------|--------------------------|--------------------|---------------|---------------|---------------|---------------|---------------|---------------|---------------|---------------|---------------|
| AUC                      | 0.70                     | 0.68               | 0.68          | 0.67          | 0.46          | 0.56          | 0.97          | 0.56          | 0.61          | 0.58          | 0.79          |
| CI                       | 0.69-<br>0.70            | 0.67-<br>0.69      | 0.67-<br>0.68 | 0.66-<br>0.67 | 0.45-<br>0.46 | 0.55-<br>0.56 | 0.93-<br>0.97 | 0.55-<br>0.56 | 0.61-<br>0.62 | 0.57-<br>0.58 | 0.78-<br>0.79 |
|                          | 0.11                     | 0.10               | 0.09          | 0.08          | -0.13         | -0.03         | 0.38          | -0.03         | 0.03          | -0.01         | 0.20          |
| Cavbase                  | 0.00                     | 0.00               | 0.00          | 0.00          | 0.00          | 0.00          | 0.00          | 0.00          | 0.00          | 0.03          | 0.00          |
|                          | 0.13                     | 0.11               | 0.11          | 0.10          | -0.11         | -0.01         | 0.40          | -0.01         | 0.04          | 0.01          | 0.22          |
| FuzCav (PDB)             | 0.00                     | 0.00               | 0.00          | 0.00          | 0.00          | 0.00          | 0.00          | 0.00          | 0.00          | 0.08          | 0.00          |
|                          | 0.13                     | 0.11               | 0.10          | 0.10          | -0.11         | -0.02         | 0.40          | -0.01         | 0.04          | 0.00          | 0.21          |
| FuzCav                   | 0.00                     | 0.00               | 0.00          | 0.00          | 0.00          | 0.00          | 0.00          | 0.00          | 0.00          | 0.35          | 0.00          |
|                          | -0.08                    | -0.09              | -0.10         | -0.11         | -0.32         | -0.22         | 0.19          | -0.22         | -0.16         | -0.20         | 0.01          |
| Grim (PDB)               | 0.00                     | 0.00               | 0.00          | 0.00          | 0.00          | 0.00          | 0.00          | 0.00          | 0.00          | 0.00          | 0.00          |
|                          | -0.05                    | -0.07              | -0.07         | -0.08         | -0.29         | -0.19         | 0.22          | -0.19         | -0.13         | -0.17         | 0.04          |
| Grim                     | 0.00                     | 0.00               | 0.00          | 0.00          | 0.00          | 0.00          | 0.00          | 0.00          | 0.00          | 0.00          | 0.00          |
|                          | -0.27                    | -0.29              | -0.30         | -0.30         | -0.51         | -0.42         | 0.00          | -0.41         | -0.36         | -0.40         | -0.19         |
| IsoMIF                   | 0.00                     | 0.00               | 0.00          | 0.00          | 0.00          | 0.00          | 0.06          | 0.00          | 0.00          | 0.00          | 0.00          |
|                          | -0.23                    | -0.25              | -0.25         | -0.26         | -0.47         | -0.37         | 0.04          | -0.37         | -0.32         | -0.35         | -0.14         |
| KRIPO                    | 0.00                     | 0.00               | 0.00          | 0.00          | 0.00          | 0.00          | 0.00          | 0.00          | 0.00          | 0.00          | 0.00          |
|                          | -0.09                    | -0.11              | -0.11         | -0.12         | -0.33         | -0.24         | 0.18          | -0.23         | -0.18         | -0.21         | 0.00          |
| PocketMatch              | 0.00                     | 0.00               | 0.00          | 0.00          | 0.00          | 0.00          | 0.00          | 0.00          | 0.00          | 0.00          | 0.29          |
|                          | 0.18                     | 0.16               | 0.15          | 0.14          | -0.07         | 0.03          | 0.45          | 0.03          | 0.09          | 0.05          | 0.26          |
| ProBiS                   | 0.00                     | 0.00               | 0.00          | 0.00          | 0.00          | 0.00          | 0.00          | 0.00          | 0.00          | 0.00          | 0.00          |
|                          | 0.10                     | 0.08               | 0.07          | 0.06          | -0.14         | -0.05         | 0.37          | -0.04         | 0.01          | -0.03         | 0.18          |
| RAPMAD                   | 0.00                     | 0.00               | 0.00          | 0.00          | 0.00          | 0.00          | 0.00          | 0.00          | 0.02          | 0.00          | 0.00          |
| VolSite/<br>Shaper (PDB) | 0.00                     | -0.02              | -0.02         | -0.03         | -0.24         | -0.14         | 0.27          | -0.14         | -0.09         | -0.12         | 0.09          |
| VolSite/<br>Shaper       | 1.00                     | 0.00               | 0.00          | 0.00          | 0.00          | 0.00          | 0.00          | 0.00          | 0.00          | 0.00          | 0.00          |
|                          | 0.02                     | 0.00               | 0.00          | -0.01         | -0.22         | -0.12         | 0.29          | -0.12         | -0.07         | -0.10         | 0.11          |
| Shaper (PDB)             | 0.00                     | 1.00               | 0.40          | 0.00          | 0.00          | 0.00          | 0.00          | 0.00          | 0.00          | 0.00          | 0.00          |
|                          | 0.02                     | 0.00               | 0.00          | -0.01         | -0.22         | -0.12         | 0.29          | -0.12         | -0.07         | -0.10         | 0.11          |
| Shaper                   | 0.00                     | 0.40               | 1.00          | 0.01          | 0.00          | 0.00          | 0.00          | 0.00          | 0.00          | 0.00          | 0.00          |
|                          | 0.03                     | 0.01               | 0.01          | 0.00          | -0.21         | -0.11         | 0.30          | -0.11         | -0.06         | -0.09         | 0.12          |
| SiteAlign                | 0.00                     | 0.00               | 0.01          | 1.00          | 0.00          | 0.00          | 0.00          | 0.00          | 0.00          | 0.00          | 0.00          |
|                          | 0.24                     | 0.22               | 0.22          | 0.21          | 0.00          | 0.10          | 0.51          | 0.10          | 0.15          | 0.12          | 0.33          |
| SiteEngine               | 0.00                     | 0.00               | 0.00          | 0.00          | 1.00          | 0.00          | 0.00          | 0.00          | 0.00          | 0.00          | 0.00          |
|                          | 0.14                     | 0.12               | 0.12          | 0.11          | -0.10         | 0.00          | 0.41          | 0.00          | 0.06          | 0.02          | 0.23          |
| SiteHopper               | 0.00                     | 0.00               | 0.00          | 0.00          | 0.00          | 1.00          | 0.00          | 0.41          | 0.00          | 0.00          | 0.00          |
|                          | -0.27                    | -0.29              | -0.29         | -0.30         | -0.51         | -0.41         | 0.00          | -0.41         | -0.36         | -0.39         | -0.18         |
| SMAP                     | 0.00                     | 0.00               | 0.00          | 0.00          | 0.00          | 0.00          | 1.00          | 0.00          | 0.00          | 0.00          | 0.00          |
|                          | 0.14                     | 0.12               | 0.12          | 0.11          | -0.10         | 0.00          | 0.41          | 0.00          | 0.05          | 0.02          | 0.23          |
| TIFP (PDB)               | 0.00                     | 0.00               | 0.00          | 0.00          | 0.00          | 0.00          | 0.00          | 1.00          | 0.00          | 0.00          | 0.00          |
|                          | 0.09                     | 0.07               | 0.07          | 0.06          | -0.15         | -0.06         | 0.36          | -0.05         | 0.00          | -0.04         | 0.18          |
| TIFP                     | 0.00                     | 0.00               | 0.00          | 0.00          | 0.00          | 0.00          | 0.00          | 0.00          | 1.00          | 0.00          | 0.00          |
|                          | 0.12                     | 0.10               | 0.10          | 0.09          | -0.12         | -0.02         | 0.39          | -0.02         | 0.04          | 0.00          | 0.21          |
| TM-align                 | 0.00                     | 0.00               | 0.00          | 0.00          | 0.00          | 0.00          | 0.00          | 0.00          | 0.00          | 0.00          | 1.00          |
|                          | -0.09                    | -0.11              | -0.11         | -0.12         | -0.33         | -0.23         | 0.18          | -0.23         | -0.18         | -0.21         | 0.00          |

**Table S4** AUC values and AUC confidence intervals for the ROC curves of the analyzed binding site comparison methods for the reduced ROCS dataset (only site pairs with a SiteHopper<sup>5</sup> PatchScore of more than 0.82 are classified as active site pairs). The pairwise AUC differences and the corresponding p-values were calculated according to DeLong and co-workers<sup>6</sup>.

|                      | Cavbase   | FuzCav (PDB) | FuzCav    | Grim (PDB) | Grim      | IsoMIF    | KRIPO     | PocketMatc <sub>h</sub> | ProBiS    | RAPMAD    |
|----------------------|-----------|--------------|-----------|------------|-----------|-----------|-----------|-------------------------|-----------|-----------|
| AUC                  | 0.69      | 0.58         | 0.58      | 0.78       | 0.76      | 0.98      | 0.97      | 0.88                    | 0.59      | 0.54      |
| CI                   | 0.68-0.70 | 0.57-0.59    | 0.57-0.59 | 0.77-0.79  | 0.75-0.77 | 0.98-0.99 | 0.96-0.97 | 0.87-0.88               | 0.58-0.60 | 0.53-0.55 |
|                      | 0.00      | -0.11        | -0.11     | 0.09       | 0.07      | 0.29      | 0.28      | 0.19                    | -0.10     | -0.15     |
| Cavbase              | 1.00      | 0.00         | 0.00      | 0.00       | 0.00      | 0.00      | 0.00      | 0.00                    | 0.00      | 0.00      |
|                      | 0.11      | 0.00         | 0.00      | 0.20       | 0.18      | 0.40      | 0.38      | 0.30                    | 0.01      | -0.04     |
| FuzCav (PDB)         | 0.00      | 1.00         | 0.81      | 0.00       | 0.00      | 0.00      | 0.00      | 0.00                    | 0.22      | 0.00      |
|                      | 0.11      | 0.00         | 0.00      | 0.20       | 0.17      | 0.40      | 0.38      | 0.29                    | 0.01      | -0.04     |
| FuzCav               | 0.00      | 0.81         | 1.00      | 0.00       | 0.00      | 0.00      | 0.00      | 0.00                    | 0.33      | 0.00      |
|                      | -0.09     | -0.20        | -0.20     | 0.00       | -0.03     | 0.20      | 0.18      | 0.09                    | -0.19     | -0.24     |
| Grim (PDB)           | 0.00      | 0.00         | 0.00      | 1.00       | 0.00      | 0.00      | 0.00      | 0.00                    | 0.00      | 0.00      |
|                      | -0.07     | -0.18        | -0.17     | 0.03       | 0.00      | 0.23      | 0.21      | 0.12                    | -0.17     | -0.22     |
| Grim                 | 0.00      | 0.00         | 0.00      | 0.00       | 1.00      | 0.00      | 0.00      | 0.00                    | 0.00      | 0.00      |
|                      | -0.29     | -0.40        | -0.40     | -0.20      | -0.23     | 0.00      | -0.02     | -0.11                   | -0.40     | -0.45     |
| IsoMIF               | 0.00      | 0.00         | 0.00      | 0.00       | 0.00      | 1.00      | 0.00      | 0.00                    | 0.00      | 0.00      |
|                      | -0.28     | -0.38        | -0.38     | -0.18      | -0.21     | 0.02      | 0.00      | -0.09                   | -0.38     | -0.43     |
| KRIPO                | 0.00      | 0.00         | 0.00      | 0.00       | 0.00      | 0.00      | 1.00      | 0.00                    | 0.00      | 0.00      |
|                      | -0.19     | -0.30        | -0.29     | -0.09      | -0.12     | 0.11      | 0.09      | 0.00                    | -0.29     | -0.34     |
| PocketMatch          | 0.00      | 0.00         | 0.00      | 0.00       | 0.00      | 0.00      | 0.00      | 1.00                    | 0.00      | 0.00      |
|                      | 0.10      | -0.01        | -0.01     | 0.19       | 0.17      | 0.40      | 0.38      | 0.29                    | 0.00      | -0.05     |
| ProBiS               | 0.00      | 0.22         | 0.33      | 0.00       | 0.00      | 0.00      | 0.00      | 0.00                    | 1.00      | 0.00      |
|                      | 0.15      | 0.04         | 0.04      | 0.24       | 0.22      | 0.45      | 0.43      | 0.34                    | 0.05      | 0.00      |
| RAPMAD               | 0.00      | 0.00         | 0.00      | 0.00       | 0.00      | 0.00      | 0.00      | 0.00                    | 0.00      | 1.00      |
| VolSite/Shaper (PDB) | -0.01     | -0.12        | -0.12     | 0.09       | 0.06      | 0.29      | 0.27      | 0.18                    | -0.11     | -0.16     |
|                      | 0.28      | 0.00         | 0.00      | 0.00       | 0.00      | 0.00      | 0.00      | 0.00                    | 0.00      | 0.00      |
| VolSite/Shaper       | 0.02      | -0.09        | -0.09     | 0.11       | 0.09      | 0.32      | 0.30      | 0.21                    | -0.08     | -0.13     |
|                      | 0.00      | 0.00         | 0.00      | 0.00       | 0.00      | 0.00      | 0.00      | 0.00                    | 0.00      | 0.00      |
| Shaper (PDB)         | -0.01     | -0.12        | -0.12     | 0.09       | 0.06      | 0.29      | 0.27      | 0.18                    | -0.11     | -0.16     |
|                      | 0.31      | 0.00         | 0.00      | 0.00       | 0.00      | 0.00      | 0.00      | 0.00                    | 0.00      | 0.00      |
| Shaper               | 0.01      | -0.10        | -0.09     | 0.11       | 0.08      | 0.31      | 0.29      | 0.20                    | -0.09     | -0.14     |
|                      | 0.05      | 0.00         | 0.00      | 0.00       | 0.00      | 0.00      | 0.00      | 0.00                    | 0.00      | 0.00      |
|                      | 0.17      | 0.06         | 0.06      | 0.26       | 0.23      | 0.46      | 0.44      | 0.35                    | 0.06      | 0.01      |
| SiteAlign            | 0.00      | 0.00         | 0.00      | 0.00       | 0.00      | 0.00      | 0.00      | 0.00                    | 0.00      | 0.02      |
|                      | 0.03      | -0.08        | -0.08     | 0.12       | 0.10      | 0.32      | 0.31      | 0.22                    | -0.07     | -0.12     |
| SiteEngine           | 0.00      | 0.00         | 0.00      | 0.00       | 0.00      | 0.00      | 0.00      | 0.00                    | 0.00      | 0.00      |
|                      | -0.31     | -0.42        | -0.42     | -0.22      | -0.24     | -0.02     | -0.04     | -0.12                   | -0.41     | -0.46     |
| SiteHopper           | 0.00      | 0.00         | 0.00      | 0.00       | 0.00      | 0.00      | 0.00      | 0.00                    | 0.00      | 0.00      |
|                      | -0.04     | -0.15        | -0.15     | 0.05       | 0.03      | 0.25      | 0.23      | 0.15                    | -0.14     | -0.19     |
| SMAP                 | 0.00      | 0.00         | 0.00      | 0.00       | 0.00      | 0.00      | 0.00      | 0.00                    | 0.00      | 0.00      |
|                      | 0.06      | -0.05        | -0.05     | 0.15       | 0.13      | 0.36      | 0.34      | 0.25                    | -0.04     | -0.09     |
| TIFP (PDB)           | 0.00      | 0.00         | 0.00      | 0.00       | 0.00      | 0.00      | 0.00      | 0.00                    | 0.00      | 0.00      |
|                      | 0.10      | -0.01        | -0.01     | 0.20       | 0.17      | 0.40      | 0.38      | 0.29                    | 0.00      | -0.05     |
| TIFP                 | 0.00      | 0.31         | 0.44      | 0.00       | 0.00      | 0.00      | 0.00      | 0.00                    | 0.86      | 0.00      |
|                      | -0.24     | -0.35        | -0.35     | -0.15      | -0.17     | 0.06      | 0.04      | -0.05                   | -0.34     | -0.39     |
| TM-align             | 0.00      | 0.00         | 0.00      | 0.00       | 0.00      | 0.00      | 0.00      | 0.00                    | 0.00      | 0.00      |

**Table S4 (continued)** AUC values and AUC confidence intervals for the ROC curves of the analyzed binding site comparison methods for the reduced ROCS dataset (only site pairs with a SiteHopper<sup>5</sup> PatchScore of more than 0.82 are classified as active site pairs). The pairwise AUC differences and the corresponding p-values were calculated according to DeLong and co-workers<sup>6</sup>.

|                          | VolSite/<br>Shaper (PDB) | VolSite/<br>Shaper | Shaper (PDB) | Shaper | SiteAlign | SiteEngine | SiteHopper | SMAP  | TIFP (PDB) | TIFP  | TM-align |
|--------------------------|--------------------------|--------------------|--------------|--------|-----------|------------|------------|-------|------------|-------|----------|
| AUC                      | 0.70                     | 0.67               | 0.70         | 0.68   | 0.52      | 0.66       | 1.00       | 0.73  | 0.63       | 0.59  | 0.93     |
| CI                       | 0.69-                    | 0.66-              | 0.69-        | 0.67-  | 0.52-     | 0.65-      | 1.00-      | 0.72- | 0.62-      | 0.58- | 0.92-    |
|                          | 0.71                     | 0.68               | 0.71         | 0.68   | 0.53      | 0.67       | 1.00       | 0.74  | 0.64       | 0.60  | 0.93     |
|                          | 0.01                     | -0.02              | 0.01         | -0.01  | -0.17     | -0.03      | 0.31       | 0.04  | -0.06      | -0.10 | 0.24     |
| Cavbase                  | 0.28                     | 0.00               | 0.31         | 0.05   | 0.00      | 0.00       | 0.00       | 0.00  | 0.00       | 0.00  | 0.00     |
|                          | 0.12                     | 0.09               | 0.12         | 0.10   | -0.06     | 0.08       | 0.42       | 0.15  | 0.05       | 0.01  | 0.35     |
| FuzCav (PDB)             | 0.00                     | 0.00               | 0.00         | 0.00   | 0.00      | 0.00       | 0.00       | 0.00  | 0.00       | 0.31  | 0.00     |
|                          | 0.12                     | 0.09               | 0.12         | 0.09   | -0.06     | 0.08       | 0.42       | 0.15  | 0.05       | 0.01  | 0.35     |
| FuzCav                   | 0.00                     | 0.00               | 0.00         | 0.00   | 0.00      | 0.00       | 0.00       | 0.00  | 0.00       | 0.44  | 0.00     |
|                          | -0.09                    | -0.11              | -0.09        | -0.11  | -0.26     | -0.12      | 0.22       | -0.05 | -0.15      | -0.20 | 0.15     |
| Grim (PDB)               | 0.00                     | 0.00               | 0.00         | 0.00   | 0.00      | 0.00       | 0.00       | 0.00  | 0.00       | 0.00  | 0.00     |
|                          | -0.06                    | -0.09              | -0.06        | -0.08  | -0.23     | -0.10      | 0.24       | -0.03 | -0.13      | -0.17 | 0.17     |
| Grim                     | 0.00                     | 0.00               | 0.00         | 0.00   | 0.00      | 0.00       | 0.00       | 0.00  | 0.00       | 0.00  | 0.00     |
|                          | -0.29                    | -0.32              | -0.29        | -0.31  | -0.46     | -0.32      | 0.02       | -0.25 | -0.36      | -0.40 | -0.06    |
| IsoMIF                   | 0.00                     | 0.00               | 0.00         | 0.00   | 0.00      | 0.00       | 0.00       | 0.00  | 0.00       | 0.00  | 0.00     |
|                          | -0.27                    | -0.30              | -0.27        | -0.29  | -0.44     | -0.31      | 0.04       | -0.23 | -0.34      | -0.38 | -0.04    |
| KRIPO                    | 0.00                     | 0.00               | 0.00         | 0.00   | 0.00      | 0.00       | 0.00       | 0.00  | 0.00       | 0.00  | 0.00     |
|                          | -0.18                    | -0.21              | -0.18        | -0.20  | -0.35     | -0.22      | 0.12       | -0.15 | -0.25      | -0.29 | 0.05     |
| PocketMatch              | 0.00                     | 0.00               | 0.00         | 0.00   | 0.00      | 0.00       | 0.00       | 0.00  | 0.00       | 0.00  | 0.00     |
|                          | 0.11                     | 0.08               | 0.11         | 0.09   | -0.06     | 0.07       | 0.41       | 0.14  | 0.04       | 0.00  | 0.34     |
| ProBiS                   | 0.00                     | 0.00               | 0.00         | 0.00   | 0.00      | 0.00       | 0.00       | 0.00  | 0.00       | 0.86  | 0.00     |
|                          | 0.16                     | 0.13               | 0.16         | 0.14   | -0.01     | 0.12       | 0.46       | 0.19  | 0.09       | 0.05  | 0.39     |
| RAPMAD                   | 0.00                     | 0.00               | 0.00         | 0.00   | 0.02      | 0.00       | 0.00       | 0.00  | 0.00       | 0.00  | 0.00     |
| VolSite/<br>Shaper (PDB) | 0.00                     | -0.03              | 0.00         | -0.02  | -0.17     | -0.04      | 0.30       | 0.03  | -0.07      | -0.11 | 0.23     |
| VolSite/<br>Shaper       | 1.00                     | 0.00               | 0.93         | 0.00   | 0.00      | 0.00       | 0.00       | 0.00  | 0.00       | 0.00  | 0.00     |
|                          | 0.03                     | 0.00               | 0.03         | 0.01   | -0.14     | -0.01      | 0.33       | 0.06  | -0.04      | -0.08 | 0.26     |
|                          | 0.00                     | 1.00               | 0.00         | 0.26   | 0.00      | 0.19       | 0.00       | 0.00  | 0.00       | 0.00  | 0.00     |
|                          | 0.00                     | -0.03              | 0.00         | -0.02  | -0.17     | -0.04      | 0.30       | 0.03  | -0.07      | -0.11 | 0.23     |
| Shaper (PDB)             | 0.93                     | 0.00               | 1.00         | 0.00   | 0.00      | 0.00       | 0.00       | 0.00  | 0.00       | 0.00  | 0.00     |
|                          | 0.02                     | -0.01              | 0.02         | 0.00   | -0.15     | -0.02      | 0.32       | 0.05  | -0.05      | -0.09 | 0.25     |
| Shaper                   | 0.00                     | 0.26               | 0.00         | 1.00   | 0.00      | 0.01       | 0.00       | 0.00  | 0.00       | 0.00  | 0.00     |
|                          | 0.17                     | 0.14               | 0.17         | 0.15   | 0.00      | 0.14       | 0.48       | 0.21  | 0.10       | 0.06  | 0.40     |
| SiteAlign                | 0.00                     | 0.00               | 0.00         | 0.00   | 1.00      | 0.00       | 0.00       | 0.00  | 0.00       | 0.00  | 0.00     |
|                          | 0.04                     | 0.01               | 0.04         | 0.02   | -0.14     | 0.00       | 0.34       | 0.07  | -0.03      | -0.07 | 0.27     |
| SiteEngine               | 0.00                     | 0.19               | 0.00         | 0.01   | 0.00      | 1.00       | 0.00       | 0.00  | 0.00       | 0.00  | 0.00     |
|                          | -0.30                    | -0.33              | -0.30        | -0.32  | -0.48     | -0.34      | 0.00       | -0.27 | -0.37      | -0.41 | -0.07    |
| SiteHopper               | 0.00                     | 0.00               | 0.00         | 0.00   | 0.00      | 0.00       | 1.00       | 0.00  | 0.00       | 0.00  | 0.00     |
|                          | -0.03                    | -0.06              | -0.03        | -0.05  | -0.21     | -0.07      | 0.27       | 0.00  | -0.10      | -0.14 | 0.20     |
| SMAP                     | 0.00                     | 0.00               | 0.00         | 0.00   | 0.00      | 0.00       | 0.00       | 1.00  | 0.00       | 0.00  | 0.00     |
|                          | 0.07                     | 0.04               | 0.07         | 0.05   | -0.10     | 0.03       | 0.37       | 0.10  | 0.00       | -0.04 | 0.30     |
| TIFP (PDB)               | 0.00                     | 0.00               | 0.00         | 0.00   | 0.00      | 0.00       | 0.00       | 0.00  | 1.00       | 0.00  | 0.00     |
|                          | 0.11                     | 0.08               | 0.11         | 0.09   | -0.06     | 0.07       | 0.41       | 0.14  | 0.04       | 0.00  | 0.34     |
| TIFP                     | 0.00                     | 0.00               | 0.00         | 0.00   | 0.00      | 0.00       | 0.00       | 0.00  | 0.00       | 1.00  | 0.00     |
|                          | -0.23                    | -0.26              | -0.23        | -0.25  | -0.40     | -0.27      | 0.07       | -0.20 | -0.30      | -0.34 | 0.00     |
| TM-align                 | 0.00                     | 0.00               | 0.00         | 0.00   | 0.00      | 0.00       | 0.00       | 0.00  | 0.00       | 0.00  | 1.00     |

**Text S1** Discussion of the TM-align performance.

A striking observation for the ROCS dataset of similar and dissimilar cavity pairs is the obviously high early enrichment for TM-align<sup>7</sup> which also uses C $\alpha$  atom coordinates to superpose structures. Partially, it can be explained by the rigorous binding site definition based on the distance to the ligands whose shape is highly similar to their “active” counterpart. On the other hand, the algorithm also relies on C $\alpha$  atom coordinates and an initial secondary structures alignment. It can also be excluded that the underlying proteins show a high overall similarity as TM-align was used to filter out those protein pairs. The analysis of the active pair with the highest TM-score in the dataset revealed the explanation for this observation. Although both proteins differ in their overall structure when taking into account more than one chain, they share a similar protein chain belonging to the CATH<sup>8</sup> homology superfamily (P-loop containing nucleotide triphosphate hydrolase 3.40.50.300 for the structures with the PDB-IDs 4hdq (chain B) and 3tnf (chain A)). Two protein chains of the structure with the PDB-ID 3tnf are involved in ligand binding and were therefore retained for binding site comparison. Nevertheless, this general observation within our dataset does not hamper the results as both binding sites differ with respect to the underlying residues. The question arises of whether similar issues could be observed for the decoy structure pairs. Therefore, we analyzed the decoy pairs with high TM-scores. No such case was found within these pairs.



## References

1. ROCS. Santa Fe, NM: OpenEye Scientific Software. Available from: URL: <http://www.eyesopen.com>.
2. Schmidtke P, Barril X. Understanding and predicting druggability. A high-throughput method for detection of drug binding sites. *J Med Chem* 2010; 53(15):5858–67.
3. Volkamer A, Kuhn D, Grombacher T, Rippmann F, Rarey M. Combining global and local measures for structure-based druggability predictions. *J Chem Inf Model* 2012; 52(2):360–72.
4. Desaphy J, Azdimousa K, Kellenberger E, Rognan D. Comparison and druggability prediction of protein-ligand binding sites from pharmacophore-annotated cavity shapes. *J Chem Inf Model* 2012; 52(8):2287–99.
5. Batista J, Hawkins PCD, Tolbert R, Geballe MT. SiteHopper - A unique tool for binding site comparison. *J Cheminform* 2014; 6(Suppl 1):P57.
6. DeLong ER, DeLong DM, Clarke-Pearson DL. Comparing the areas under two or more correlated receiver operating characteristic curves: A nonparametric approach. *Biometrics* 1988; 44(3):837–45.
7. Zhang Y, Skolnick J. TM-align: a protein structure alignment algorithm based on the TM-score. *Nucleic Acids Res* 2005; 33(7):2302–9.
8. Sillitoe I, Lewis TE, Cuff A, Das S, Ashford P, Dawson NL et al. CATH: Comprehensive structural and functional annotations for genome sequences. *Nucleic Acids Res* 2015; 43(Database issue):81.
